# Supplementary material for: The radio spectra of planar aromatic heterocycles: how to quantify and predict the negative inertial defects
Source: Royal Society of Chemistry journal article supplement (doi:10.1039/c6cp07487a), 2017-01-01
Supplement: c6cp07487a1.pdf [file c6cp07487a1.pdf]

Supplemental Material

S1: Rotational transitions of 5,6-benzoquinoline

| J  | K <sub>a</sub> | K <sub>c</sub> | F <sub>1</sub> | F  | J' | K <sub>a</sub> | K <sub>c</sub> | F <sub>1</sub> | F  | v <sub>obs.</sub> / MHz | v <sub>calc.</sub> / MHz | Δv / MHz |
|----|----------------|----------------|----------------|----|----|----------------|----------------|----------------|----|-------------------------|--------------------------|----------|
| 15 | 15             | 1              | 1              | 16 | 14 | 14             | 0              | 1              | 15 | 48086.57600             | 48086.57249              | 0.00351  |
| 16 | 15             | 1              | 1              | 17 | 15 | 14             | 2              | 1              | 16 | 49062.85200             | 49062.88364              | -0.03164 |
| 17 | 15             | 2              | 1              | 18 | 16 | 14             | 3              | 1              | 17 | 50039.06400             | 50039.08572              | -0.02172 |
| 17 | 16             | 1              | 1              | 18 | 16 | 15             | 2              | 1              | 17 | 52345.46100             | 52345.43595              | 0.02505  |
| 18 | 14             | 4              | 1              | 19 | 17 | 13             | 5              | 1              | 18 | 48708.04000             | 48708.07613              | -0.03613 |
| 18 | 16             | 2              | 1              | 19 | 17 | 15             | 3              | 1              | 18 | 53321.67500             | 53321.65729              | 0.01771  |
| 19 | 15             | 4              | 1              | 20 | 18 | 14             | 5              | 1              | 19 | 51990.83900             | 51990.83493              | 0.00407  |
| 20 | 13             | 7              | 1              | 21 | 19 | 12             | 8              | 1              | 20 | 48347.91700             | 48347.93832              | -0.02132 |
| 20 | 14             | 6              | 1              | 21 | 19 | 13             | 7              | 1              | 20 | 50657.88700             | 50657.88716              | -0.00016 |
| 20 | 19             | 1              | 1              | 21 | 19 | 18             | 2              | 1              | 20 | 62192.98800             | 62192.95900              | 0.02900  |
| 22 | 13             | 9              | 1              | 23 | 21 | 12             | 10             | 1              | 22 | 50291.49900             | 50291.50055              | -0.00155 |
| 23 | 19             | 4              | 1              | 24 | 22 | 18             | 5              | 1              | 23 | 65121.33100             | 65121.34834              | -0.01734 |
| 28 | 10             | 18             | 1              | 29 | 27 | 9              | 19             | 1              | 28 | 48919.50800             | 48919.50107              | 0.00693  |
| 29 | 10             | 20             | 1              | 30 | 28 | 9              | 19             | 1              | 29 | 49783.45000             | 49783.47692              | -0.02692 |
| 24 | 12             | 13             | 1              | 25 | 23 | 11             | 12             | 1              | 24 | 49903.12300             | 49903.14435              | -0.02135 |
| 29 | 13             | 17             | 1              | 30 | 28 | 12             | 16             | 1              | 29 | 57034.08400             | 57034.05888              | 0.02512  |
| 31 | 13             | 19             | 1              | 32 | 30 | 12             | 18             | 1              | 31 | 58933.27200             | 58933.26174              | 0.01026  |
| 25 | 11             | 15             | 1              | 26 | 24 | 10             | 14             | 1              | 25 | 48516.69500             | 48516.64843              | 0.04657  |
| 26 | 14             | 12             | 1              | 27 | 25 | 13             | 13             | 1              | 26 | 56485.00500             | 56484.99518              | 0.00982  |
| 21 | 14             | 7              | 1              | 22 | 20 | 13             | 8              | 1              | 21 | 51631.80000             | 51631.80032              | -0.00032 |
| 27 | 11             | 16             | 1              | 28 | 26 | 10             | 17             | 1              | 27 | 50407.41900             | 50407.43696              | -0.01796 |
| 27 | 11             | 17             | 1              | 28 | 26 | 10             | 16             | 1              | 27 | 50406.66600             | 50406.64643              | 0.01957  |
| 27 | 10             | 17             | 1              | 28 | 26 | 9              | 18             | 1              | 27 | 48000.76200             | 48000.73747              | 0.02453  |
| 30 | 9              | 21             | 1              | 31 | 29 | 8              | 22             | 1              | 30 | 48412.51000             | 48412.54210              | -0.03210 |
| 28 | 10             | 19             | 1              | 29 | 27 | 9              | 18             | 1              | 28 | 48893.87400             | 48893.91300              | -0.03900 |
| 23 | 12             | 12             | 1              | 24 | 22 | 11             | 11             | 1              | 23 | 48939.48800             | 48939.48553              | 0.00247  |
| 23 | 12             | 11             | 1              | 24 | 22 | 11             | 12             | 1              | 23 | 48939.48800             | 48939.48631              | 0.00169  |
| 21 | 13             | 9              | 1              | 22 | 20 | 12             | 8              | 1              | 21 | 49320.32800             | 49320.33854              | -0.01054 |
| 21 | 13             | 8              | 1              | 22 | 20 | 12             | 9              | 1              | 21 | 49320.32800             | 49320.33854              | -0.01054 |
| 19 | 14             | 6              | 1              | 20 | 18 | 13             | 5              | 1              | 19 | 49683.25400             | 49683.26604              | -0.01204 |
| 19 | 14             | 5              | 1              | 20 | 18 | 13             | 6              | 1              | 19 | 49683.25400             | 49683.26604              | -0.01204 |
| 29 | 10             | 19             | 1              | 30 | 28 | 9              | 20             | 1              | 29 | 49831.74200             | 49831.74464              | -0.00264 |
| 30 | 10             | 21             | 1              | 31 | 29 | 9              | 20             | 1              | 30 | 50650.67900             | 50650.68183              | -0.00283 |
| 30 | 10             | 20             | 1              | 31 | 29 | 9              | 21             | 1              | 30 | 50739.09000             | 50739.07502              | 0.01498  |

| J  | K <sub>a</sub> | K <sub>c</sub> | F <sub>1</sub> | F  | J' | K <sub>a</sub> | K <sub>c</sub> | F <sub>1</sub> | F  | v <sub>obs.</sub> / MHz | v <sub>calc.</sub> / MHz | Δv / MHz |
|----|----------------|----------------|----------------|----|----|----------------|----------------|----------------|----|-------------------------|--------------------------|----------|
| 25 | 12             | 14             | 1              | 26 | 24 | 11             | 13             | 1              | 25 | 50864.00600             | 50864.00673              | -0.00073 |
| 25 | 12             | 13             | 1              | 26 | 24 | 11             | 14             | 1              | 25 | 50864.00600             | 50864.01261              | -0.00661 |
| 18 | 15             | 4              | 1              | 19 | 17 | 14             | 3              | 1              | 18 | 51015.09800             | 51015.09901              | -0.00101 |
| 18 | 15             | 3              | 1              | 19 | 17 | 14             | 4              | 1              | 18 | 51015.09800             | 51015.09901              | -0.00101 |
| 23 | 13             | 11             | 1              | 24 | 22 | 12             | 10             | 1              | 23 | 51261.21700             | 51261.20536              | 0.01164  |
| 23 | 13             | 10             | 1              | 24 | 22 | 12             | 11             | 1              | 23 | 51261.21700             | 51261.20538              | 0.01162  |
| 16 | 16             | 0              | 1              | 17 | 15 | 15             | 1              | 1              | 16 | 51369.13600             | 51369.11990              | 0.01610  |
| 16 | 16             | 1              | 1              | 17 | 15 | 15             | 0              | 1              | 16 | 51369.13600             | 51369.11990              | 0.01610  |
| 21 | 14             | 8              | 1              | 22 | 20 | 13             | 7              | 1              | 21 | 51631.78900             | 51631.80032              | -0.01132 |
| 21 | 14             | 7              | 1              | 22 | 20 | 13             | 8              | 1              | 21 | 51631.78900             | 51631.80032              | -0.01132 |
| 26 | 12             | 15             | 1              | 27 | 25 | 11             | 14             | 1              | 26 | 51821.68000             | 51821.67789              | 0.00211  |
| 26 | 12             | 14             | 1              | 27 | 25 | 11             | 15             | 1              | 26 | 51821.68000             | 51821.69287              | -0.01287 |
| 24 | 13             | 12             | 1              | 25 | 23 | 12             | 11             | 1              | 24 | 52229.21100             | 52229.21562              | -0.00462 |
| 24 | 13             | 11             | 1              | 25 | 23 | 12             | 12             | 1              | 24 | 52229.21100             | 52229.21568              | -0.00468 |
| 32 | 10             | 23             | 1              | 33 | 31 | 9              | 22             | 1              | 32 | 52281.99500             | 52281.98475              | 0.01025  |
| 32 | 10             | 22             | 1              | 33 | 31 | 9              | 23             | 1              | 32 | 52554.32400             | 52554.31565              | 0.00835  |
| 22 | 14             | 9              | 1              | 23 | 21 | 13             | 8              | 1              | 22 | 52604.84100             | 52604.85419              | -0.01319 |
| 22 | 14             | 8              | 1              | 23 | 21 | 13             | 9              | 1              | 22 | 52604.84100             | 52604.85419              | -0.01319 |
| 20 | 15             | 6              | 1              | 21 | 19 | 14             | 5              | 1              | 20 | 52966.20300             | 52966.19592              | 0.00708  |
| 20 | 15             | 5              | 1              | 21 | 19 | 14             | 6              | 1              | 20 | 52966.20300             | 52966.19592              | 0.00708  |
| 23 | 14             | 10             | 1              | 24 | 22 | 13             | 9              | 1              | 23 | 53576.87000             | 53576.88480              | -0.01480 |
| 23 | 14             | 9              | 1              | 24 | 22 | 13             | 10             | 1              | 23 | 53576.87000             | 53576.88480              | -0.01480 |
| 21 | 15             | 7              | 1              | 22 | 20 | 14             | 6              | 1              | 21 | 53941.08700             | 53941.07525              | 0.01175  |
| 21 | 15             | 6              | 1              | 22 | 20 | 14             | 7              | 1              | 21 | 53941.08700             | 53941.07525              | 0.01175  |
| 19 | 16             | 3              | 1              | 20 | 18 | 15             | 4              | 1              | 19 | 54297.69700             | 54297.71527              | -0.01827 |
| 19 | 16             | 4              | 1              | 20 | 18 | 15             | 3              | 1              | 19 | 54297.69700             | 54297.71527              | -0.01827 |
| 17 | 17             | 1              | 1              | 18 | 16 | 16             | 0              | 1              | 17 | 54651.65500             | 54651.64694              | 0.00806  |
| 17 | 17             | 0              | 1              | 18 | 16 | 16             | 1              | 1              | 17 | 54651.65500             | 54651.64694              | 0.00806  |
| 22 | 15             | 8              | 1              | 23 | 21 | 14             | 7              | 1              | 22 | 54915.34400             | 54915.35681              | -0.01281 |
| 22 | 15             | 7              | 1              | 23 | 21 | 14             | 8              | 1              | 22 | 54915.34400             | 54915.35681              | -0.01281 |
| 20 | 16             | 5              | 1              | 21 | 19 | 15             | 4              | 1              | 20 | 55273.53600             | 55273.53403              | 0.00197  |
| 20 | 16             | 4              | 1              | 21 | 19 | 15             | 5              | 1              | 20 | 55273.53600             | 55273.53403              | 0.00197  |
| 18 | 17             | 2              | 1              | 19 | 17 | 16             | 1              | 1              | 18 | 55627.99700             | 55627.96662              | 0.03038  |
| 18 | 17             | 1              | 1              | 19 | 17 | 16             | 2              | 1              | 18 | 55627.99700             | 55627.96662              | 0.03038  |
| 23 | 15             | 9              | 1              | 24 | 22 | 14             | 8              | 1              | 23 | 55888.92200             | 55888.91487              | 0.00713  |
| 23 | 15             | 8              | 1              | 24 | 22 | 14             | 9              | 1              | 23 | 55888.92200             | 55888.91487              | 0.00713  |
| 21 | 16             | 5              | 1              | 22 | 20 | 15             | 6              | 1              | 21 | 56249.03800             | 56249.03037              | 0.00763  |
| 21 | 16             | 6              | 1              | 22 | 20 | 15             | 5              | 1              | 21 | 56249.03800             | 56249.03037              | 0.00763  |

| J  | K <sub>a</sub> | K <sub>c</sub> | F <sub>1</sub> | F  | J' | K <sub>a</sub> | K <sub>c</sub> | F <sub>1</sub> | F  | v <sub>obs.</sub> / MHz | v <sub>calc.</sub> / MHz | Δv / MHz |
|----|----------------|----------------|----------------|----|----|----------------|----------------|----------------|----|-------------------------|--------------------------|----------|
| 19 | 17             | 2              | 1              | 20 | 18 | 16             | 3              | 1              | 19 | 56604.21600             | 56604.20323              | 0.01277  |
| 19 | 17             | 3              | 1              | 20 | 18 | 16             | 2              | 1              | 19 | 56604.21600             | 56604.20323              | 0.01277  |
| 20 | 17             | 4              | 1              | 21 | 19 | 16             | 3              | 1              | 20 | 57580.29200             | 57580.29705              | -0.00505 |
| 20 | 17             | 3              | 1              | 21 | 19 | 16             | 4              | 1              | 20 | 57580.29200             | 57580.29705              | -0.00505 |
| 18 | 18             | 0              | 1              | 19 | 17 | 17             | 1              | 1              | 18 | 57934.14000             | 57934.15235              | -0.01235 |
| 18 | 18             | 1              | 1              | 19 | 17 | 17             | 0              | 1              | 18 | 57934.14000             | 57934.15235              | -0.01235 |
| 23 | 16             | 8              | 1              | 24 | 22 | 15             | 7              | 1              | 23 | 58198.70100             | 58198.68568              | 0.01532  |
| 23 | 16             | 7              | 1              | 24 | 22 | 15             | 8              | 1              | 23 | 58198.70100             | 58198.68568              | 0.01532  |
| 21 | 17             | 5              | 1              | 22 | 20 | 16             | 4              | 1              | 21 | 58556.19700             | 58556.18237              | 0.01463  |
| 21 | 17             | 4              | 1              | 22 | 20 | 16             | 5              | 1              | 21 | 58556.19700             | 58556.18237              | 0.01463  |
| 19 | 18             | 1              | 1              | 20 | 18 | 17             | 2              | 1              | 19 | 58910.47800             | 58910.47466              | 0.00334  |
| 19 | 18             | 2              | 1              | 20 | 18 | 17             | 1              | 1              | 19 | 58910.47800             | 58910.47466              | 0.00334  |
| 22 | 17             | 6              | 1              | 23 | 21 | 16             | 5              | 1              | 22 | 59531.76600             | 59531.78748              | -0.02148 |
| 22 | 17             | 5              | 1              | 23 | 21 | 16             | 6              | 1              | 22 | 59531.76600             | 59531.78748              | -0.02148 |
| 20 | 18             | 2              | 1              | 19 | 19 | 17             | 3              | 1              | 20 | 59886.70900             | 59886.72347              | -0.01447 |
| 20 | 18             | 3              | 1              | 19 | 19 | 17             | 2              | 1              | 20 | 59886.70900             | 59886.72347              | -0.01447 |
| 21 | 18             | 3              | 1              | 22 | 20 | 17             | 4              | 1              | 21 | 60862.84300             | 60862.84634              | -0.00334 |
| 21 | 18             | 4              | 1              | 22 | 20 | 17             | 3              | 1              | 21 | 60862.84300             | 60862.84634              | -0.00334 |
| 19 | 19             | 0              | 1              | 20 | 18 | 18             | 1              | 1              | 19 | 61216.64800             | 61216.63484              | 0.01316  |
| 19 | 19             | 1              | 1              | 20 | 18 | 18             | 0              | 1              | 19 | 61216.64800             | 61216.63484              | 0.01316  |
| 22 | 18             | 4              | 1              | 23 | 21 | 17             | 5              | 1              | 22 | 61838.80900             | 61838.78585              | 0.02315  |
| 22 | 18             | 5              | 1              | 23 | 21 | 17             | 4              | 1              | 22 | 61838.80900             | 61838.78585              | 0.02315  |
| 21 | 19             | 2              | 1              | 22 | 20 | 18             | 3              | 1              | 21 | 63169.20800             | 63169.21760              | -0.00960 |
| 21 | 19             | 3              | 1              | 22 | 20 | 18             | 2              | 1              | 21 | 63169.20800             | 63169.21760              | -0.00960 |
| 15 | 0              | 15             | 0              | 15 | 14 | 0              | 14             | 0              | 14 | 12888.09551             | 12888.09559              | -0.00008 |
| 15 | 0              | 15             | 0              | 14 | 14 | 0              | 14             | 0              | 13 | 12888.12657             | 12888.12754              | -0.00097 |
| 15 | 0              | 15             | 0              | 16 | 14 | 0              | 14             | 0              | 15 | 12888.13428             | 12888.13374              | 0.00054  |
| 15 | 0              | 15             | 0              | 15 | 14 | 1              | 14             | 0              | 14 | 12883.95544             | 12883.95560              | -0.00016 |
| 15 | 0              | 15             | 0              | 14 | 14 | 1              | 14             | 0              | 13 | 12883.98324             | 12883.98425              | -0.00101 |
| 15 | 0              | 15             | 0              | 16 | 14 | 1              | 14             | 0              | 15 | 12883.99122             | 12883.99067              | 0.00055  |
| 16 | 0              | 16             | 0              | 16 | 15 | 0              | 15             | 0              | 15 | 13718.88737             | 13718.88729              | 0.00008  |
| 16 | 0              | 16             | 0              | 15 | 15 | 0              | 15             | 0              | 14 | 13718.91429             | 13718.91497              | -0.00068 |
| 16 | 0              | 16             | 0              | 17 | 15 | 0              | 15             | 0              | 16 | 13718.92116             | 13718.92069              | 0.00047  |
| 16 | 0              | 16             | 0              | 16 | 15 | 1              | 15             | 0              | 15 | 13716.60994             | 13716.60982              | 0.00012  |
| 16 | 0              | 16             | 0              | 15 | 15 | 1              | 15             | 0              | 14 | 13716.63522             | 13716.63579              | -0.00057 |
| 16 | 0              | 16             | 0              | 17 | 15 | 1              | 15             | 0              | 16 | 13716.64220             | 13716.64161              | 0.00059  |
| 17 | 0              | 17             | 0              | 17 | 16 | 0              | 16             | 0              | 16 | 14549.89690             | 14549.89692              | -0.00002 |
| 17 | 0              | 17             | 0              | 16 | 16 | 0              | 16             | 0              | 15 | 14549.92076             | 14549.92120              | -0.00044 |

| J  | K <sub>a</sub> | K <sub>c</sub> | F <sub>1</sub> | F  | J' | K <sub>a</sub> | K <sub>c</sub> | F <sub>1</sub> | F  | v <sub>obs.</sub> / MHz | v <sub>calc.</sub> / MHz | Δv / MHz |
|----|----------------|----------------|----------------|----|----|----------------|----------------|----------------|----|-------------------------|--------------------------|----------|
| 17 | 0              | 17             | 0              | 18 | 16 | 0              | 16             | 0              | 17 | 14549.92749             | 14549.92647              | 0.00102  |
| 12 | 1              | 12             | 0              | 12 | 11 | 0              | 11             | 0              | 11 | 10412.33693             | 10412.33719              | -0.00026 |
| 12 | 1              | 12             | 0              | 11 | 11 | 0              | 11             | 0              | 10 | 10412.40355             | 10412.40408              | -0.00053 |
| 12 | 1              | 12             | 0              | 13 | 11 | 0              | 11             | 0              | 12 | 10412.41112             | 10412.41073              | 0.00039  |
| 12 | 1              | 12             | 0              | 12 | 11 | 1              | 11             | 0              | 11 | 10388.85343             | 10388.85333              | 0.00010  |
| 12 | 1              | 12             | 0              | 11 | 11 | 1              | 11             | 0              | 10 | 10388.89712             | 10388.89778              | -0.00066 |
| 12 | 1              | 12             | 0              | 13 | 11 | 1              | 11             | 0              | 12 | 10388.90660             | 10388.90626              | 0.00034  |
| 14 | 1              | 13             | 0              | 14 | 13 | 1              | 12             | 0              | 13 | 12942.98976             | 12942.99026              | -0.00050 |
| 14 | 1              | 13             | 0              | 15 | 13 | 1              | 12             | 0              | 14 | 12943.13437             | 12943.13542              | -0.00105 |
| 14 | 1              | 13             | 0              | 13 | 13 | 1              | 12             | 0              | 12 | 12943.14300             | 12943.14254              | 0.00046  |
| 15 | 1              | 15             | 0              | 15 | 14 | 0              | 14             | 0              | 14 | 12890.37247             | 12890.37306              | -0.00059 |
| 15 | 1              | 15             | 0              | 14 | 14 | 0              | 14             | 0              | 13 | 12890.40588             | 12890.40672              | -0.00084 |
| 15 | 1              | 15             | 0              | 16 | 14 | 0              | 14             | 0              | 15 | 12890.41345             | 12890.41282              | 0.00063  |
| 15 | 1              | 15             | 0              | 15 | 14 | 1              | 14             | 0              | 14 | 12886.23301             | 12886.23307              | -0.00006 |
| 15 | 1              | 15             | 0              | 14 | 14 | 1              | 14             | 0              | 13 | 12886.26265             | 12886.26344              | -0.00079 |
| 15 | 1              | 15             | 0              | 16 | 14 | 1              | 14             | 0              | 15 | 12886.27011             | 12886.26975              | 0.00036  |
| 16 | 1              | 16             | 0              | 16 | 15 | 0              | 15             | 0              | 15 | 13720.13099             | 13720.13104              | -0.00005 |
| 16 | 1              | 16             | 0              | 15 | 15 | 0              | 15             | 0              | 14 | 13720.15893             | 13720.15960              | -0.00067 |
| 16 | 1              | 16             | 0              | 17 | 15 | 0              | 15             | 0              | 16 | 13720.16576             | 13720.16527              | 0.00049  |
| 16 | 1              | 16             | 0              | 16 | 15 | 1              | 15             | 0              | 15 | 13717.85361             | 13717.85357              | 0.00004  |
| 16 | 1              | 16             | 0              | 15 | 15 | 1              | 15             | 0              | 14 | 13717.87975             | 13717.88042              | -0.00067 |
| 16 | 1              | 16             | 0              | 17 | 15 | 1              | 15             | 0              | 16 | 13717.88660             | 13717.88619              | 0.00041  |
| 17 | 1              | 17             | 0              | 17 | 16 | 0              | 16             | 0              | 16 | 14550.57269             | 14550.57182              | 0.00087  |
| 17 | 1              | 17             | 0              | 16 | 16 | 0              | 16             | 0              | 15 | 14550.59599             | 14550.59656              | -0.00057 |
| 17 | 1              | 17             | 0              | 18 | 16 | 0              | 16             | 0              | 17 | 14550.60247             | 14550.60181              | 0.00066  |
| 17 | 1              | 17             | 0              | 17 | 16 | 1              | 16             | 0              | 16 | 14549.32839             | 14549.32808              | 0.00031  |
| 17 | 1              | 17             | 0              | 16 | 16 | 1              | 16             | 0              | 15 | 14549.35149             | 14549.35193              | -0.00044 |
| 17 | 1              | 17             | 0              | 18 | 16 | 1              | 16             | 0              | 17 | 14549.35799             | 14549.35722              | 0.00077  |
| 10 | 2              | 8              | 0              | 10 | 9  | 2              | 7              | 0              | 9  | 10337.88311             | 10337.88314              | -0.00003 |
| 10 | 2              | 8              | 0              | 11 | 9  | 2              | 7              | 0              | 10 | 10337.94012             | 10337.93996              | 0.00016  |
| 10 | 2              | 8              | 0              | 9  | 9  | 2              | 7              | 0              | 8  | 10337.95950             | 10337.95966              | -0.00016 |
| 10 | 2              | 9              | 0              | 10 | 9  | 1              | 8              | 0              | 9  | 10438.43897             | 10438.43858              | 0.00039  |
| 10 | 2              | 9              | 0              | 11 | 9  | 1              | 8              | 0              | 10 | 10439.13615             | 10439.13608              | 0.00007  |
| 10 | 2              | 9              | 0              | 9  | 9  | 1              | 8              | 0              | 8  | 10439.20955             | 10439.20916              | 0.00039  |
| 14 | 2              | 13             | 0              | 14 | 13 | 2              | 12             | 0              | 13 | 12864.60043             | 12864.60028              | 0.00015  |
| 14 | 2              | 13             | 0              | 15 | 13 | 2              | 12             | 0              | 14 | 12864.69640             | 12864.69534              | 0.00106  |
| 14 | 2              | 13             | 0              | 13 | 13 | 2              | 12             | 0              | 12 | 12864.69791             | 12864.69817              | -0.00026 |
| 11 | 2              | 10             | 0              | 11 | 10 | 2              | 9              | 0              | 10 | 10295.21127             | 10295.21121              | 0.00006  |

| J  | K <sub>a</sub> | K <sub>c</sub> | F <sub>1</sub> | F  | J' | K <sub>a</sub> | K <sub>c</sub> | F <sub>1</sub> | F  | v <sub>obs.</sub> / MHz | v <sub>calc.</sub> / MHz | Δv / MHz |
|----|----------------|----------------|----------------|----|----|----------------|----------------|----------------|----|-------------------------|--------------------------|----------|
| 11 | 2              | 10             | 0              | 12 | 10 | 2              | 9              | 0              | 11 | 10295.31399             | 10295.31435              | -0.00036 |
| 11 | 2              | 10             | 0              | 10 | 10 | 2              | 9              | 0              | 9  | 10295.32052             | 10295.31994              | 0.00058  |
| 6  | 3              | 3              | 0              | 5  | 5  | 2              | 4              | 0              | 4  | 11826.92986             | 11826.92954              | 0.00032  |
| 6  | 3              | 3              | 0              | 7  | 5  | 2              | 4              | 0              | 6  | 11826.99353             | 11826.99348              | 0.00005  |
| 6  | 3              | 3              | 0              | 6  | 5  | 2              | 4              | 0              | 5  | 11827.36748             | 11827.36660              | 0.00088  |
| 7  | 3              | 4              | 0              | 6  | 6  | 2              | 5              | 0              | 5  | 13007.91838             | 13007.91789              | 0.00049  |
| 7  | 3              | 4              | 0              | 7  | 6  | 2              | 5              | 0              | 6  | 13008.58227             | 13008.58273              | -0.00046 |
| 7  | 3              | 5              | 0              | 7  | 6  | 2              | 4              | 0              | 6  | 12084.05891             | 12084.05848              | 0.00043  |
| 7  | 3              | 5              | 0              | 8  | 6  | 2              | 4              | 0              | 7  | 12084.85638             | 12084.85570              | 0.00068  |
| 7  | 3              | 5              | 0              | 6  | 6  | 2              | 4              | 0              | 5  | 12084.99823             | 12084.99829              | -0.00006 |
| 8  | 3              | 6              | 0              | 8  | 7  | 2              | 5              | 0              | 7  | 12719.87651             | 12719.87650              | 0.00001  |
| 8  | 3              | 6              | 0              | 9  | 7  | 2              | 5              | 0              | 8  | 12720.78686             | 12720.78601              | 0.00085  |
| 8  | 3              | 6              | 0              | 7  | 7  | 2              | 5              | 0              | 6  | 12720.92089             | 12720.92112              | -0.00023 |
| 13 | 3              | 11             | 0              | 13 | 12 | 3              | 10             | 0              | 12 | 12613.90178             | 12613.90261              | -0.00083 |
| 13 | 3              | 11             | 0              | 14 | 12 | 3              | 10             | 0              | 13 | 12613.96985             | 12613.97038              | -0.00053 |
| 13 | 3              | 11             | 0              | 12 | 12 | 3              | 10             | 0              | 11 | 12613.97714             | 12613.97661              | 0.00053  |
| 12 | 3              | 9              | 0              | 13 | 11 | 3              | 8              | 0              | 12 | 12419.75417             | 12419.75371              | 0.00046  |
| 12 | 3              | 9              | 0              | 12 | 11 | 3              | 8              | 0              | 11 | 12419.84772             | 12419.84748              | 0.00024  |
| 6  | 4              | 3              | 0              | 6  | 5  | 3              | 2              | 0              | 5  | 13912.80920             | 13912.80972              | -0.00052 |
| 6  | 4              | 3              | 0              | 7  | 5  | 3              | 2              | 0              | 6  | 13912.92116             | 13912.92074              | 0.00042  |
| 6  | 4              | 3              | 0              | 5  | 5  | 3              | 2              | 0              | 4  | 13912.94663             | 13912.94702              | -0.00039 |
| 8  | 4              | 5              | 0              | 8  | 7  | 3              | 4              | 0              | 7  | 15761.76876             | 15761.76925              | -0.00049 |
| 8  | 4              | 5              | 0              | 9  | 7  | 3              | 4              | 0              | 8  | 15762.02932             | 15762.02875              | 0.00057  |
| 8  | 4              | 5              | 0              | 7  | 7  | 3              | 4              | 0              | 6  | 15762.07039             | 15762.07120              | -0.00081 |
| 7  | 4              | 3              | 0              | 7  | 6  | 3              | 4              | 0              | 6  | 14921.31312             | 14921.31267              | 0.00045  |
| 7  | 4              | 3              | 0              | 8  | 6  | 3              | 4              | 0              | 7  | 14921.32691             | 14921.32721              | -0.00030 |
| 7  | 4              | 3              | 0              | 6  | 6  | 3              | 4              | 0              | 5  | 14921.33681             | 14921.33605              | 0.00076  |
| 6  | 5              | 2              | 0              | 6  | 5  | 4              | 1              | 0              | 5  | 16235.64907             | 16235.64960              | -0.00053 |
| 6  | 5              | 2              | 0              | 7  | 5  | 4              | 1              | 0              | 6  | 16235.69014             | 16235.69090              | -0.00076 |
| 6  | 5              | 2              | 0              | 5  | 5  | 4              | 1              | 0              | 4  | 16235.69854             | 16235.69826              | 0.00028  |
| 6  | 5              | 1              | 0              | 6  | 5  | 4              | 2              | 0              | 5  | 16235.97914             | 16235.97898              | 0.00016  |
| 6  | 5              | 1              | 0              | 7  | 5  | 4              | 2              | 0              | 6  | 16236.01815             | 16236.01887              | -0.00072 |
| 8  | 4              | 4              | 0              | 9  | 7  | 3              | 5              | 0              | 8  | 15924.02063             | 15924.02080              | -0.00017 |
| 8  | 4              | 4              | 0              | 8  | 7  | 3              | 5              | 0              | 7  | 15924.05285             | 15924.05273              | 0.00012  |
| 13 | 4              | 10             | 0              | 14 | 12 | 4              | 9              | 0              | 13 | 12855.37213             | 12855.37211              | 0.00002  |
| 13 | 4              | 10             | 0              | 13 | 12 | 4              | 9              | 0              | 12 | 12855.38271             | 12855.38207              | 0.00064  |
| 13 | 5              | 8              | 0              | 14 | 12 | 5              | 7              | 0              | 13 | 12883.41172             | 12883.41223              | -0.00051 |
| 13 | 5              | 8              | 0              | 13 | 12 | 5              | 7              | 0              | 12 | 12883.48397             | 12883.48419              | -0.00022 |

## S1: Rotational transitions of 7,8-benzoquinoline

| J | K <sub>a</sub> | K <sub>c</sub> | F <sub>1</sub> | F | J' | K <sub>a</sub> | K <sub>c</sub> | F <sub>1</sub> | F | v <sub>obs.</sub> / MHz | v <sub>calc.</sub> / MHz | Δv / MHz |
|---|----------------|----------------|----------------|---|----|----------------|----------------|----------------|---|-------------------------|--------------------------|----------|
| 5 | 3              | 2              | 0              | 4 | 4  | 2              | 3              | 0              | 3 | 10644.00353             | 10644.00283              | 0.00070  |
| 5 | 3              | 2              | 0              | 6 | 4  | 2              | 3              | 0              | 5 | 10644.06732             | 10644.06756              | -0.00024 |
| 5 | 3              | 2              | 0              | 5 | 4  | 2              | 3              | 0              | 4 | 10644.34290             | 10644.34338              | -0.00048 |
| 5 | 3              | 3              | 0              | 5 | 4  | 2              | 2              | 0              | 4 | 10402.91180             | 10402.91205              | -0.00025 |
| 5 | 3              | 3              | 0              | 6 | 4  | 2              | 2              | 0              | 5 | 10403.28766             | 10403.28696              | 0.00070  |
| 5 | 3              | 3              | 0              | 4 | 4  | 2              | 2              | 0              | 3 | 10403.39102             | 10403.39117              | -0.00015 |
| 7 | 3              | 4              | 0              | 6 | 6  | 2              | 5              | 0              | 5 | 13018.23998             | 13018.23982              | 0.00016  |
| 7 | 3              | 4              | 0              | 8 | 6  | 2              | 5              | 0              | 7 | 13018.33853             | 13018.33783              | 0.00070  |
| 7 | 3              | 4              | 0              | 7 | 6  | 2              | 5              | 0              | 6 | 13018.95480             | 13018.95448              | 0.00032  |
| 8 | 3              | 6              | 0              | 8 | 7  | 2              | 5              | 0              | 7 | 12568.20038             | 12568.19939              | 0.00099  |
| 8 | 3              | 6              | 0              | 9 | 7  | 2              | 5              | 0              | 8 | 12568.99418             | 12568.99369              | 0.00049  |
| 8 | 3              | 6              | 0              | 7 | 7  | 2              | 5              | 0              | 6 | 12569.11313             | 12569.11187              | 0.00126  |
| 5 | 4              | 1              | 0              | 6 | 4  | 3              | 2              | 0              | 5 | 12764.12396             | 12764.12426              | -0.00030 |
| 5 | 4              | 1              | 0              | 4 | 4  | 3              | 2              | 0              | 3 | 12764.12981             | 12764.12849              | 0.00132  |
| 5 | 4              | 1              | 0              | 5 | 4  | 3              | 2              | 0              | 4 | 12764.13844             | 12764.13935              | -0.00091 |
| 5 | 4              | 2              | 0              | 5 | 4  | 3              | 1              | 0              | 4 | 12757.12020             | 12757.11982              | 0.00038  |
| 5 | 4              | 2              | 0              | 6 | 4  | 3              | 1              | 0              | 5 | 12757.13464             | 12757.13432              | 0.00032  |
| 5 | 4              | 2              | 0              | 4 | 4  | 3              | 1              | 0              | 3 | 12757.14546             | 12757.14639              | -0.00093 |
| 6 | 4              | 3              | 0              | 6 | 5  | 3              | 2              | 0              | 5 | 13737.92374             | 13737.92389              | -0.00015 |
| 6 | 4              | 3              | 0              | 7 | 5  | 3              | 2              | 0              | 6 | 13737.98043             | 13737.97966              | 0.00077  |
| 6 | 4              | 3              | 0              | 5 | 5  | 3              | 2              | 0              | 4 | 13737.99499             | 13737.99546              | -0.00047 |
| 7 | 4              | 4              | 0              | 7 | 6  | 3              | 3              | 0              | 6 | 14693.49342             | 14693.49346              | -0.00004 |
| 7 | 4              | 4              | 0              | 8 | 6  | 3              | 3              | 0              | 7 | 14693.61851             | 14693.61842              | 0.00009  |
| 7 | 4              | 4              | 0              | 6 | 6  | 3              | 3              | 0              | 5 | 14693.64422             | 14693.64422              | 0.00000  |
| 7 | 4              | 3              | 0              | 6 | 6  | 3              | 4              | 0              | 5 | 14777.75459             | 14777.75576              | -0.00117 |
| 7 | 4              | 3              | 0              | 8 | 6  | 3              | 4              | 0              | 7 | 14777.75921             | 14777.75839              | 0.00082  |
| 7 | 4              | 3              | 0              | 7 | 6  | 3              | 4              | 0              | 6 | 14777.80088             | 14777.80118              | -0.00030 |
| 3 | 2              | 2              | 0              | 3 | 2  | 1              | 1              | 0              | 2 | 6092.28090              | 6092.28117               | -0.00027 |
| 3 | 2              | 2              | 0              | 4 | 2  | 1              | 1              | 0              | 3 | 6093.21618              | 6093.21549               | 0.00069  |
| 3 | 2              | 2              | 0              | 2 | 2  | 1              | 1              | 0              | 1 | 6093.73338              | 6093.73400               | -0.00062 |
| 7 | 0              | 7              | 0              | 6 | 6  | 1              | 6              | 0              | 5 | 6124.76771              | 6124.76745               | 0.00026  |
| 7 | 0              | 7              | 0              | 8 | 6  | 1              | 6              | 0              | 7 | 6124.81137              | 6124.81145               | -0.00008 |
| 7 | 0              | 7              | 0              | 7 | 6  | 1              | 6              | 0              | 6 | 6124.87620              | 6124.87628               | -0.00008 |
| 6 | 1              | 5              | 0              | 6 | 5  | 1              | 4              | 0              | 5 | 6254.17517              | 6254.17532               | -0.00015 |
| 6 | 1              | 5              | 0              | 7 | 5  | 1              | 4              | 0              | 6 | 6254.31772              | 6254.31766               | 0.00006  |
| 6 | 1              | 5              | 0              | 5 | 5  | 1              | 4              | 0              | 4 | 6254.36679              | 6254.36705               | -0.00026 |

| J  | K <sub>a</sub> | K <sub>c</sub> | F <sub>1</sub> | F  | J' | K <sub>a</sub> | K <sub>c</sub> | F <sub>1</sub> | F  | v <sub>obs.</sub> / MHz | v <sub>calc.</sub> / MHz | Δv / MHz |
|----|----------------|----------------|----------------|----|----|----------------|----------------|----------------|----|-------------------------|--------------------------|----------|
| 7  | 1              | 7              | 0              | 7  | 6  | 1              | 6              | 0              | 6  | 6277.31809              | 6277.31839               | -0.00030 |
| 7  | 1              | 7              | 0              | 6  | 6  | 1              | 6              | 0              | 5  | 6277.37779              | 6277.37804               | -0.00025 |
| 7  | 1              | 7              | 0              | 8  | 6  | 1              | 6              | 0              | 7  | 6277.40090              | 6277.40087               | 0.00003  |
| 7  | 1              | 7              | 0              | 7  | 6  | 0              | 6              | 0              | 6  | 6523.85801              | 6523.85814               | -0.00013 |
| 7  | 1              | 7              | 0              | 8  | 6  | 0              | 6              | 0              | 7  | 6524.18821              | 6524.18845               | -0.00024 |
| 7  | 1              | 7              | 0              | 6  | 6  | 0              | 6              | 0              | 5  | 6524.20743              | 6524.20748               | -0.00005 |
| 7  | 4              | 4              | 0              | 8  | 6  | 4              | 3              | 0              | 7  | 7017.34182              | 7017.34267               | -0.00085 |
| 7  | 4              | 4              | 0              | 6  | 6  | 4              | 3              | 0              | 5  | 7017.34737              | 7017.34586               | 0.00151  |
| 7  | 4              | 4              | 0              | 7  | 6  | 4              | 3              | 0              | 6  | 7017.35187              | 7017.35335               | -0.00148 |
| 7  | 3              | 5              | 0              | 7  | 6  | 3              | 4              | 0              | 6  | 7018.18916              | 7018.19079               | -0.00163 |
| 7  | 3              | 5              | 0              | 8  | 6  | 3              | 4              | 0              | 7  | 7018.19450              | 7018.19466               | -0.00016 |
| 7  | 3              | 5              | 0              | 6  | 6  | 3              | 4              | 0              | 5  | 7018.19952              | 7018.19839               | 0.00113  |
| 7  | 3              | 4              | 0              | 6  | 6  | 3              | 3              | 0              | 5  | 7126.30138              | 7126.30081               | 0.00057  |
| 7  | 3              | 4              | 0              | 8  | 6  | 3              | 3              | 0              | 7  | 7126.31077              | 7126.31114               | -0.00037 |
| 7  | 3              | 4              | 0              | 7  | 6  | 3              | 3              | 0              | 6  | 7126.42639              | 7126.42627               | 0.00012  |
| 8  | 1              | 8              | 0              | 8  | 7  | 1              | 7              | 0              | 7  | 7137.57645              | 7137.57653               | -0.00008 |
| 8  | 1              | 8              | 0              | 7  | 7  | 1              | 7              | 0              | 6  | 7137.63510              | 7137.63525               | -0.00015 |
| 8  | 1              | 8              | 0              | 9  | 7  | 1              | 7              | 0              | 8  | 7137.65255              | 7137.65290               | -0.00035 |
| 8  | 0              | 8              | 0              | 8  | 7  | 0              | 7              | 0              | 7  | 7199.36310              | 7199.36316               | -0.00006 |
| 8  | 0              | 8              | 0              | 7  | 7  | 0              | 7              | 0              | 6  | 7199.49634              | 7199.49676               | -0.00042 |
| 8  | 0              | 8              | 0              | 9  | 7  | 0              | 7              | 0              | 8  | 7199.50358              | 7199.50366               | -0.00008 |
| 7  | 1              | 6              | 0              | 7  | 6  | 1              | 5              | 0              | 6  | 7213.63554              | 7213.63561               | -0.00007 |
| 7  | 1              | 6              | 0              | 8  | 6  | 1              | 5              | 0              | 7  | 7213.81955              | 7213.81937               | 0.00018  |
| 7  | 1              | 6              | 0              | 6  | 6  | 1              | 5              | 0              | 5  | 7213.85980              | 7213.85998               | -0.00018 |
| 7  | 2              | 5              | 0              | 8  | 6  | 2              | 4              | 0              | 7  | 7398.51695              | 7398.51715               | -0.00020 |
| 7  | 2              | 5              | 0              | 6  | 6  | 2              | 4              | 0              | 5  | 7398.52454              | 7398.52480               | -0.00026 |
| 7  | 2              | 5              | 0              | 7  | 6  | 2              | 4              | 0              | 6  | 7398.60217              | 7398.60220               | -0.00003 |
| 8  | 2              | 7              | 0              | 8  | 7  | 2              | 6              | 0              | 7  | 7760.21183              | 7760.21176               | 0.00007  |
| 8  | 2              | 7              | 0              | 9  | 7  | 2              | 6              | 0              | 8  | 7760.30492              | 7760.30528               | -0.00036 |
| 8  | 2              | 7              | 0              | 7  | 7  | 2              | 6              | 0              | 6  | 7760.31138              | 7760.31112               | 0.00026  |
| 12 | 1              | 11             | 0              | 11 | 11 | 2              | 10             | 0              | 10 | 11093.56858             | 11093.56763              | 0.00095  |
| 12 | 1              | 11             | 0              | 13 | 11 | 2              | 10             | 0              | 12 | 11093.57612             | 11093.57600              | 0.00012  |
| 12 | 1              | 11             | 0              | 12 | 11 | 2              | 10             | 0              | 11 | 11093.61144             | 11093.61119              | 0.00025  |
| 11 | 4              | 7              | 0              | 10 | 10 | 4              | 6              | 0              | 9  | 11245.10851             | 11245.10892              | -0.00041 |
| 11 | 4              | 7              | 0              | 12 | 10 | 4              | 6              | 0              | 11 | 11245.11639             | 11245.11603              | 0.00036  |
| 11 | 4              | 7              | 0              | 11 | 10 | 4              | 6              | 0              | 10 | 11245.21678             | 11245.21721              | -0.00043 |
| 12 | 2              | 11             | 0              | 12 | 11 | 2              | 10             | 0              | 11 | 11331.13473             | 11331.13435              | 0.00038  |
| 12 | 2              | 11             | 0              | 13 | 11 | 2              | 10             | 0              | 12 | 11331.23198             | 11331.23250              | -0.00052 |

| J  | K <sub>a</sub> | K <sub>c</sub> | F <sub>1</sub> | F  | J' | K <sub>a</sub> | K <sub>c</sub> | F <sub>1</sub> | F  | v <sub>obs.</sub> / MHz | v <sub>calc.</sub> / MHz | Δv / MHz |
|----|----------------|----------------|----------------|----|----|----------------|----------------|----------------|----|-------------------------|--------------------------|----------|
| 12 | 2              | 11             | 0              | 11 | 11 | 2              | 10             | 0              | 10 | 11331.23596             | 11331.23528              | 0.00068  |
| 13 | 0              | 13             | 0              | 13 | 12 | 1              | 12             | 0              | 12 | 11373.53803             | 11373.53816              | -0.00013 |
| 13 | 0              | 13             | 0              | 12 | 12 | 1              | 12             | 0              | 11 | 11373.56884             | 11373.56824              | 0.00060  |
| 13 | 1              | 13             | 0              | 13 | 12 | 1              | 12             | 0              | 12 | 11378.38567             | 11378.38553              | 0.00014  |
| 13 | 1              | 13             | 0              | 12 | 12 | 1              | 12             | 0              | 11 | 11378.41955             | 11378.41919              | 0.00036  |
| 13 | 1              | 13             | 0              | 14 | 12 | 1              | 12             | 0              | 13 | 11378.42733             | 11378.42756              | -0.00023 |
| 13 | 0              | 13             | 0              | 13 | 12 | 0              | 12             | 0              | 12 | 11382.50640             | 11382.50620              | 0.00020  |
| 13 | 0              | 13             | 0              | 12 | 12 | 0              | 12             | 0              | 11 | 11382.54366             | 11382.54332              | 0.00034  |
| 13 | 0              | 13             | 0              | 14 | 12 | 0              | 12             | 0              | 13 | 11382.55101             | 11382.55141              | -0.00040 |
| 13 | 1              | 13             | 0              | 13 | 12 | 0              | 12             | 0              | 12 | 11387.35430             | 11387.35357              | 0.00073  |
| 13 | 1              | 13             | 0              | 12 | 12 | 0              | 12             | 0              | 11 | 11387.39477             | 11387.39426              | 0.00051  |
| 13 | 1              | 13             | 0              | 14 | 12 | 0              | 12             | 0              | 13 | 11387.40155             | 11387.40210              | -0.00055 |
| 12 | 1              | 11             | 0              | 12 | 11 | 1              | 10             | 0              | 11 | 11471.18979             | 11471.19014              | -0.00035 |
| 12 | 1              | 11             | 0              | 13 | 11 | 1              | 10             | 0              | 12 | 11471.36842             | 11471.36805              | 0.00037  |
| 12 | 1              | 11             | 0              | 11 | 11 | 1              | 10             | 0              | 10 | 11471.37858             | 11471.37913              | -0.00055 |
| 11 | 2              | 9              | 0              | 11 | 10 | 2              | 8              | 0              | 10 | 11528.62914             | 11528.62959              | -0.00045 |
| 11 | 2              | 9              | 0              | 12 | 10 | 2              | 8              | 0              | 11 | 11528.75495             | 11528.75496              | -0.00001 |
| 11 | 2              | 9              | 0              | 10 | 10 | 2              | 8              | 0              | 9  | 11528.77470             | 11528.77446              | 0.00024  |
| 12 | 3              | 10             | 0              | 12 | 11 | 3              | 9              | 0              | 11 | 11908.32877             | 11908.32855              | 0.00022  |
| 12 | 3              | 10             | 0              | 13 | 11 | 3              | 9              | 0              | 12 | 11908.39272             | 11908.39333              | -0.00061 |
| 12 | 3              | 10             | 0              | 11 | 11 | 3              | 9              | 0              | 10 | 11908.39880             | 11908.39864              | 0.00016  |
| 12 | 5              | 8              | 0              | 13 | 11 | 5              | 7              | 0              | 12 | 12108.82650             | 12108.82704              | -0.00054 |
| 12 | 5              | 8              | 0              | 11 | 11 | 5              | 7              | 0              | 10 | 12108.84608             | 12108.84645              | -0.00037 |
| 12 | 5              | 8              | 0              | 12 | 11 | 5              | 7              | 0              | 11 | 12108.86830             | 12108.86767              | 0.00063  |
| 12 | 5              | 7              | 0              | 13 | 11 | 5              | 6              | 0              | 12 | 12132.80512             | 12132.80302              | 0.00210  |
| 12 | 5              | 7              | 0              | 12 | 11 | 5              | 6              | 0              | 11 | 12132.85181             | 12132.85217              | -0.00036 |
| 14 | 0              | 14             | 0              | 14 | 13 | 1              | 13             | 0              | 13 | 12219.37798             | 12219.37798              | 0.00000  |
| 14 | 0              | 14             | 0              | 13 | 13 | 1              | 13             | 0              | 12 | 12219.40603             | 12219.40563              | 0.00040  |
| 14 | 0              | 14             | 0              | 15 | 13 | 1              | 13             | 0              | 14 | 12219.41300             | 12219.41328              | -0.00028 |
| 14 | 1              | 14             | 0              | 14 | 13 | 1              | 13             | 0              | 13 | 12221.97235             | 12221.97236              | -0.00001 |
| 14 | 1              | 14             | 0              | 13 | 13 | 1              | 13             | 0              | 12 | 12222.00170             | 12222.00182              | -0.00012 |
| 14 | 1              | 14             | 0              | 15 | 13 | 1              | 13             | 0              | 14 | 12222.00912             | 12222.00935              | -0.00023 |
| 14 | 0              | 14             | 0              | 14 | 13 | 0              | 13             | 0              | 13 | 12224.22525             | 12224.22535              | -0.00010 |
| 14 | 0              | 14             | 0              | 13 | 13 | 0              | 13             | 0              | 12 | 12224.25650             | 12224.25658              | -0.00008 |
| 14 | 0              | 14             | 0              | 15 | 13 | 0              | 13             | 0              | 14 | 12224.26393             | 12224.26397              | -0.00004 |
| 14 | 1              | 14             | 0              | 14 | 13 | 0              | 13             | 0              | 13 | 12226.81963             | 12226.81973              | -0.00010 |
| 14 | 1              | 14             | 0              | 13 | 13 | 0              | 13             | 0              | 12 | 12226.85258             | 12226.85276              | -0.00018 |
| 14 | 1              | 14             | 0              | 15 | 13 | 0              | 13             | 0              | 14 | 12226.86010             | 12226.86004              | 0.00006  |



| J  | K <sub>a</sub> | K <sub>c</sub> | F <sub>1</sub> | F  | J' | K <sub>a</sub> | K <sub>c</sub> | F <sub>1</sub> | F  | v <sub>obs.</sub> / MHz | v <sub>calc.</sub> / MHz | Δv / MHz |
|----|----------------|----------------|----------------|----|----|----------------|----------------|----------------|----|-------------------------|--------------------------|----------|
| 12 | 4              | 8              | 0              | 11 | 11 | 4              | 7              | 0              | 10 | 12363.13569             | 12363.13564              | 0.00005  |
| 12 | 4              | 8              | 0              | 13 | 11 | 4              | 7              | 0              | 12 | 12363.14231             | 12363.14254              | -0.00023 |
| 12 | 4              | 8              | 0              | 12 | 11 | 4              | 7              | 0              | 11 | 12363.26475             | 12363.26467              | 0.00008  |
| 12 | 3              | 9              | 0              | 13 | 11 | 3              | 8              | 0              | 12 | 12738.08800             | 12738.08808              | -0.00008 |
| 12 | 3              | 9              | 0              | 11 | 11 | 3              | 8              | 0              | 10 | 12738.09118             | 12738.09066              | 0.00052  |
| 12 | 3              | 9              | 0              | 12 | 11 | 3              | 8              | 0              | 11 | 12738.14106             | 12738.14130              | -0.00024 |
| 13 | 3              | 11             | 0              | 13 | 12 | 3              | 10             | 0              | 12 | 12839.98105             | 12839.98046              | 0.00059  |
| 13 | 3              | 11             | 0              | 14 | 12 | 3              | 10             | 0              | 13 | 12840.05428             | 12840.05516              | -0.00088 |
| 13 | 3              | 11             | 0              | 12 | 12 | 3              | 10             | 0              | 11 | 12840.06065             | 12840.06042              | 0.00023  |
| 15 | 1              | 15             | 0              | 15 | 14 | 1              | 14             | 0              | 14 | 13065.20499             | 13065.20499              | 0.00000  |
| 15 | 1              | 15             | 0              | 14 | 14 | 1              | 14             | 0              | 13 | 13065.23159             | 13065.23086              | 0.00073  |
| 15 | 1              | 15             | 0              | 16 | 14 | 1              | 14             | 0              | 15 | 13065.23700             | 13065.23767              | -0.00067 |
| 15 | 0              | 15             | 0              | 15 | 14 | 0              | 14             | 0              | 14 | 13066.42276             | 13066.42244              | 0.00032  |
| 15 | 0              | 15             | 0              | 14 | 14 | 0              | 14             | 0              | 13 | 13066.44910             | 13066.44920              | -0.00010 |
| 15 | 0              | 15             | 0              | 16 | 14 | 0              | 14             | 0              | 15 | 13066.45582             | 13066.45595              | -0.00013 |
| 14 | 3              | 11             | 0              | 14 | 13 | 3              | 10             | 0              | 13 | 14863.10885             | 14863.10853              | 0.00032  |
| 14 | 3              | 11             | 0              | 15 | 13 | 3              | 10             | 0              | 14 | 14863.15202             | 14863.15096              | 0.00106  |
| 14 | 3              | 11             | 0              | 13 | 13 | 3              | 10             | 0              | 12 | 14863.15947             | 14863.16052              | -0.00105 |
| 18 | 0              | 18             | 0              | 18 | 17 | 1              | 17             | 0              | 17 | 15593.88409             | 15593.88462              | -0.00053 |
| 18 | 0              | 18             | 0              | 17 | 17 | 1              | 17             | 0              | 16 | 15593.90182             | 15593.90256              | -0.00074 |
| 18 | 0              | 18             | 0              | 19 | 17 | 1              | 17             | 0              | 18 | 15593.90913             | 15593.90773              | 0.00140  |
| 8  | 4              | 5              | 0              | 8  | 7  | 3              | 4              | 0              | 7  | 15603.15274             | 15603.15380              | -0.00106 |
| 8  | 4              | 5              | 0              | 9  | 7  | 3              | 4              | 0              | 8  | 15603.37471             | 15603.37542              | -0.00071 |
| 8  | 4              | 5              | 0              | 7  | 7  | 3              | 4              | 0              | 6  | 15603.40985             | 15603.41118              | -0.00133 |
| 8  | 4              | 4              | 0              | 7  | 7  | 3              | 5              | 0              | 6  | 15811.12975             | 15811.13162              | -0.00187 |
| 8  | 4              | 4              | 0              | 9  | 7  | 3              | 5              | 0              | 8  | 15811.13871             | 15811.14014              | -0.00143 |
| 8  | 4              | 4              | 0              | 8  | 7  | 3              | 5              | 0              | 7  | 15811.22499             | 15811.22588              | -0.00089 |
| 6  | 3              | 3              | 0              | 5  | 5  | 2              | 4              | 0              | 4  | 11778.09032             | 11778.09057              | -0.00025 |
| 6  | 3              | 3              | 0              | 7  | 5  | 2              | 4              | 0              | 6  | 11778.16792             | 11778.16740              | 0.00052  |
| 7  | 3              | 5              | 0              | 7  | 6  | 2              | 4              | 0              | 6  | 11946.98908             | 11946.98918              | -0.00010 |
| 6  | 3              | 4              | 0              | 7  | 5  | 2              | 3              | 0              | 6  | 11225.21541             | 11225.21453              | 0.00088  |
| 6  | 3              | 4              | 0              | 5  | 5  | 2              | 3              | 0              | 4  | 11225.33319             | 11225.33278              | 0.00041  |
| 4  | 4              | 0              | 0              | 5  | 3  | 3              | 1              | 0              | 4  | 11765.66306             | 11765.66232              | 0.00074  |
| 4  | 4              | 0              | 0              | 4  | 3  | 3              | 1              | 0              | 3  | 11765.67365             | 11765.67314              | 0.00051  |
| 4  | 4              | 1              | 0              | 5  | 3  | 3              | 0              | 0              | 4  | 11764.67277             | 11764.67288              | -0.00011 |
| 4  | 4              | 1              | 0              | 4  | 3  | 3              | 0              | 0              | 3  | 11764.67818             | 11764.67700              | 0.00118  |
| 6  | 4              | 2              | 0              | 7  | 5  | 3              | 3              | 0              | 6  | 13766.07869             | 13766.07924              | -0.00055 |
| 6  | 4              | 2              | 0              | 6  | 5  | 3              | 3              | 0              | 5  | 13766.10265             | 13766.10247              | 0.00018  |

| J  | K <sub>a</sub> | K <sub>c</sub> | F <sub>1</sub> | F  | J' | K <sub>a</sub> | K <sub>c</sub> | F <sub>1</sub> | F  | v <sub>obs.</sub> / MHz | v <sub>calc.</sub> / MHz | Δv / MHz |
|----|----------------|----------------|----------------|----|----|----------------|----------------|----------------|----|-------------------------|--------------------------|----------|
| 5  | 5              | 0              | 0              | 6  | 4  | 4              | 1              | 0              | 5  | 14984.37957             | 14984.37865              | 0.00092  |
| 5  | 5              | 0              | 0              | 4  | 4  | 4              | 1              | 0              | 3  | 14984.38810             | 14984.38649              | 0.00161  |
| 5  | 5              | 1              | 0              | 5  | 4  | 4              | 0              | 0              | 4  | 14984.33327             | 14984.33331              | -0.00004 |
| 7  | 4              | 3              | 0              | 8  | 6  | 4              | 2              | 0              | 7  | 7023.09644              | 7023.09660               | -0.00016 |
| 7  | 4              | 3              | 0              | 7  | 6  | 4              | 2              | 0              | 6  | 7023.11777              | 7023.11771               | 0.00006  |
| 11 | 6              | 6              | 0              | 12 | 10 | 6              | 5              | 0              | 11 | 11036.72804             | 11036.72777              | 0.00027  |
| 11 | 6              | 6              | 0              | 10 | 10 | 6              | 5              | 0              | 9  | 11036.74206             | 11036.74322              | -0.00116 |
| 11 | 6              | 5              | 0              | 12 | 10 | 6              | 4              | 0              | 11 | 11037.17099             | 11037.17199              | -0.00100 |
| 11 | 6              | 5              | 0              | 11 | 10 | 6              | 4              | 0              | 10 | 11037.18325             | 11037.18366              | -0.00041 |
| 11 | 5              | 7              | 0              | 10 | 10 | 5              | 6              | 0              | 9  | 11076.97735             | 11076.97759              | -0.00024 |
| 11 | 5              | 7              | 0              | 11 | 10 | 5              | 6              | 0              | 10 | 11077.00178             | 11077.00164              | 0.00014  |
| 11 | 5              | 6              | 0              | 10 | 10 | 5              | 5              | 0              | 9  | 11087.80598             | 11087.80494              | 0.00104  |
| 11 | 5              | 6              | 0              | 11 | 10 | 5              | 5              | 0              | 10 | 11087.84015             | 11087.84007              | 0.00008  |
| 11 | 4              | 8              | 0              | 10 | 10 | 4              | 7              | 0              | 9  | 11104.63299             | 11104.63233              | 0.00066  |
| 11 | 4              | 8              | 0              | 11 | 10 | 4              | 7              | 0              | 10 | 11104.64323             | 11104.64413              | -0.00090 |
| 11 | 3              | 8              | 0              | 12 | 10 | 3              | 7              | 0              | 11 | 11620.32911             | 11620.32957              | -0.00046 |
| 11 | 3              | 8              | 0              | 11 | 10 | 3              | 7              | 0              | 10 | 11620.42976             | 11620.42966              | 0.00010  |
| 13 | 6              | 8              | 0              | 12 | 12 | 6              | 7              | 0              | 11 | 13088.28450             | 13088.28443              | 0.00007  |
| 13 | 6              | 8              | 0              | 13 | 12 | 6              | 7              | 0              | 12 | 13088.30647             | 13088.30620              | 0.00027  |
| 16 | 2              | 15             | 0              | 16 | 15 | 2              | 14             | 0              | 15 | 14750.25403             | 14750.25407              | -0.00004 |
| 16 | 2              | 15             | 0              | 15 | 15 | 2              | 14             | 0              | 14 | 14750.32826             | 14750.32825              | 0.00001  |
| 16 | 1              | 15             | 0              | 16 | 15 | 1              | 14             | 0              | 15 | 14771.70543             | 14771.70532              | 0.00011  |
| 16 | 1              | 15             | 0              | 17 | 15 | 1              | 14             | 0              | 16 | 14771.79114             | 14771.79098              | 0.00016  |
| 12 | 2              | 10             | 0              | 13 | 11 | 2              | 9              | 0              | 12 | 12453.46325             | 12453.46353              | -0.00028 |
| 12 | 2              | 10             | 0              | 11 | 11 | 2              | 9              | 0              | 10 | 12453.48279             | 12453.48245              | 0.00034  |
| 9  | 6              | 4              | 0              | 9  | 9  | 5              | 5              | 0              | 9  | 12161.62216             | 12161.62225              | -0.00009 |
| 9  | 6              | 4              | 0              | 10 | 9  | 5              | 5              | 0              | 10 | 12161.63773             | 12161.63876              | -0.00103 |
| 9  | 6              | 3              | 0              | 10 | 9  | 5              | 4              | 0              | 10 | 12159.42009             | 12159.41994              | 0.00015  |
| 7  | 0              | 7              | 0              | 7  | 6  | 0              | 6              | 0              | 6  | 6371.41585              | 6371.41603               | -0.00018 |
| 7  | 0              | 7              | 0              | 8  | 6  | 0              | 6              | 0              | 7  | 6371.59909              | 6371.59902               | 0.00007  |
| 14 | 1              | 13             | 0              | 14 | 13 | 2              | 12             | 0              | 13 | 12964.84183             | 12964.84218              | -0.00035 |
| 14 | 1              | 13             | 0              | 15 | 13 | 2              | 12             | 0              | 14 | 12964.88313             | 12964.88325              | -0.00012 |
| 13 | 2              | 12             | 0              | 13 | 12 | 1              | 11             | 0              | 12 | 12432.29443             | 12432.29454              | -0.00011 |
| 13 | 2              | 12             | 0              | 13 | 12 | 2              | 11             | 0              | 12 | 12194.77113             | 12194.77139              | -0.00026 |
| 13 | 2              | 12             | 0              | 12 | 12 | 2              | 11             | 0              | 11 | 12194.86591             | 12194.86687              | -0.00096 |
| 12 | 4              | 9              | 0              | 13 | 11 | 4              | 8              | 0              | 12 | 12122.39697             | 12122.39693              | 0.00004  |
| 16 | 15             | 1              | 1              | 16 | 15 | 14             | 2              | 1              | 15 | 48171.81200             | 48171.80877              | 0.00323  |
| 17 | 17             | 1              | 1              | 17 | 16 | 16             | 0              | 1              | 16 | 53612.61000             | 53612.58172              | 0.02828  |

| J  | K <sub>a</sub> | K <sub>c</sub> | F <sub>1</sub> | F  | J' | K <sub>a</sub> | K <sub>c</sub> | F <sub>1</sub> | F  | v <sub>obs.</sub> / MHz | v <sub>calc.</sub> / MHz | Δv / MHz |
|----|----------------|----------------|----------------|----|----|----------------|----------------|----------------|----|-------------------------|--------------------------|----------|
| 18 | 15             | 4              | 1              | 18 | 17 | 14             | 3              | 1              | 17 | 50165.55200             | 50165.52992              | 0.02208  |
| 18 | 18             | 1              | 1              | 18 | 17 | 17             | 0              | 1              | 17 | 56831.52300             | 56831.48596              | 0.03704  |
| 19 | 14             | 6              | 1              | 19 | 18 | 13             | 5              | 1              | 18 | 48938.52500             | 48938.55264              | -0.02764 |
| 19 | 15             | 5              | 1              | 19 | 18 | 14             | 4              | 1              | 18 | 51161.99400             | 51161.95623              | 0.03777  |
| 19 | 19             | 1              | 1              | 19 | 18 | 18             | 0              | 1              | 18 | 60050.40100             | 60050.36768              | 0.03332  |
| 20 | 15             | 6              | 1              | 20 | 19 | 14             | 5              | 1              | 19 | 52157.96700             | 52157.94428              | 0.02272  |
| 20 | 19             | 2              | 1              | 20 | 19 | 18             | 1              | 1              | 19 | 61047.47600             | 61047.48310              | -0.00710 |
| 21 | 13             | 8              | 1              | 20 | 20 | 12             | 9              | 1              | 19 | 48699.96900             | 48700.00556              | -0.03656 |
| 21 | 14             | 8              | 1              | 20 | 20 | 13             | 7              | 1              | 19 | 50927.95200             | 50927.96768              | -0.01568 |
| 21 | 18             | 4              | 1              | 21 | 20 | 17             | 3              | 1              | 20 | 59822.52500             | 59822.50571              | 0.01929  |
| 22 | 15             | 8              | 1              | 22 | 21 | 14             | 7              | 1              | 21 | 54148.08500             | 54148.09416              | -0.00916 |
| 22 | 16             | 7              | 1              | 22 | 21 | 15             | 6              | 1              | 21 | 56372.88600             | 56372.89196              | -0.00596 |
| 22 | 20             | 3              | 1              | 22 | 21 | 19             | 2              | 1              | 21 | 65263.38900             | 65263.39199              | -0.00299 |
| 22 | 22             | 1              | 1              | 22 | 21 | 21             | 0              | 1              | 21 | 69706.86300             | 69706.86526              | -0.00226 |
| 23 | 12             | 11             | 1              | 24 | 22 | 11             | 12             | 1              | 23 | 48440.38600             | 48440.39391              | -0.00791 |
| 23 | 17             | 7              | 1              | 23 | 22 | 16             | 6              | 1              | 22 | 59592.27200             | 59592.28133              | -0.00933 |
| 23 | 22             | 2              | 1              | 23 | 22 | 21             | 1              | 1              | 22 | 70703.99000             | 70703.98510              | 0.00490  |
| 24 | 12             | 12             | 1              | 25 | 23 | 11             | 13             | 1              | 24 | 49422.62700             | 49422.61228              | 0.01472  |
| 24 | 14             | 11             | 1              | 23 | 23 | 13             | 10             | 1              | 22 | 53903.99600             | 53904.01640              | -0.02040 |
| 24 | 17             | 8              | 1              | 24 | 23 | 16             | 7              | 1              | 23 | 60587.61600             | 60587.62028              | -0.00428 |
| 25 | 11             | 14             | 1              | 26 | 24 | 10             | 15             | 1              | 25 | 48131.10500             | 48131.28776              | -0.18276 |
| 25 | 12             | 13             | 1              | 24 | 24 | 11             | 14             | 1              | 23 | 50401.51400             | 50401.51899              | -0.00499 |
| 25 | 16             | 10             | 1              | 24 | 24 | 15             | 9              | 1              | 23 | 59355.81000             | 59355.78757              | 0.02243  |
| 25 | 21             | 5              | 1              | 25 | 24 | 20             | 4              | 1              | 24 | 70476.02400             | 70475.98568              | 0.03832  |
| 26 | 11             | 15             | 1              | 25 | 25 | 10             | 16             | 1              | 24 | 49094.41600             | 49094.86218              | -0.44618 |
| 26 | 13             | 13             | 1              | 27 | 25 | 12             | 14             | 1              | 26 | 53635.30400             | 53635.25535              | 0.04865  |
| 26 | 14             | 13             | 1              | 25 | 25 | 13             | 12             | 1              | 24 | 55880.21300             | 55880.21640              | -0.00340 |
| 26 | 16             | 11             | 1              | 25 | 25 | 15             | 10             | 1              | 24 | 60348.27500             | 60348.27344              | 0.00156  |
| 27 | 14             | 13             | 1              | 26 | 26 | 13             | 14             | 1              | 25 | 56865.27000             | 56865.23070              | 0.03930  |
| 27 | 15             | 13             | 1              | 26 | 26 | 14             | 12             | 1              | 25 | 59105.61800             | 59105.62292              | -0.00492 |
| 28 | 13             | 15             | 1              | 27 | 27 | 12             | 16             | 1              | 26 | 55590.70200             | 55590.69884              | 0.00316  |
| 28 | 15             | 14             | 1              | 27 | 27 | 14             | 13             | 1              | 26 | 60092.62000             | 60092.60653              | 0.01347  |
| 29 | 15             | 15             | 1              | 28 | 28 | 14             | 14             | 1              | 27 | 61077.60100             | 61077.58113              | 0.01987  |
| 30 | 14             | 16             | 1              | 29 | 29 | 13             | 17             | 1              | 28 | 59804.34400             | 59804.42191              | -0.07791 |
| 17 | 15             | 3              | 1              | 17 | 16 | 14             | 2              | 1              | 16 | 49168.69500             | 49168.77956              | -0.08456 |

Table S2 Ground State Combination Difference Fit (MHz)

| J' | Ka' | Kc' | J'' | Ka'' | Kc'' | GSCD exp    | GSCD calc   | exp-calc  |
|----|-----|-----|-----|------|------|-------------|-------------|-----------|
| 2  | 2   | 0   | 2   | 0    | 2    | 2326.40000  | 2315.77790  | 10.62210  |
| 3  | 2   | 1   | 3   | 0    | 3    | 2695.10000  | 2689.27235  | 5.82765   |
| 4  | 3   | 2   | 3   | 1    | 2    | 7611.70000  | 7643.10940  | -31.40940 |
| 4  | 4   | 1   | 2   | 2    | 1    | 13056.00000 | 13085.65074 | -29.65074 |
| 5  | 2   | 4   | 4   | 2    | 2    | 3810.40000  | 3839.62011  | -29.22011 |
| 4  | 3   | 1   | 4   | 1    | 3    | 3786.40000  | 3778.39979  | 8.00021   |
| 4  | 4   | 0   | 4   | 2    | 2    | 6112.80000  | 6097.69727  | 15.10273  |
| 5  | 4   | 2   | 4   | 4    | 0    | 4655.80000  | 4689.25652  | -33.45652 |
| 6  | 1   | 6   | 5   | 1    | 4    | 1894.70000  | 1914.16014  | -19.46014 |
| 5  | 2   | 3   | 5   | 0    | 5    | 4517.90000  | 4499.61818  | 18.28182  |
| 6  | 2   | 5   | 5   | 2    | 3    | 4029.20000  | 4054.40489  | -25.20489 |
| 6  | 0   | 6   | 5   | 2    | 4    | 1400.00000  | 1394.53581  | 5.46419   |
| 5  | 3   | 2   | 5   | 1    | 4    | 3888.30000  | 3859.60066  | 28.69934  |
| 5  | 1   | 5   | 4   | 1    | 3    | 1999.60000  | 2013.38553  | -13.78553 |
| 6  | 4   | 2   | 5   | 4    | 2    | 5696.10000  | 5706.44151  | -10.34151 |
| 6  | 5   | 2   | 4   | 3    | 2    | 18997.90000 | 18989.95797 | 7.94203   |
| 6  | 6   | 0   | 5   | 4    | 2    | 16443.60000 | 16458.45314 | -14.85314 |
| 7  | 1   | 7   | 5   | 1    | 5    | 10022.10000 | 10040.07721 | -17.97721 |
| 6  | 2   | 5   | 5   | 0    | 5    | 8541.10000  | 8554.02307  | -12.92307 |
| 7  | 0   | 7   | 6   | 2    | 5    | 1499.00000  | 1514.40483  | -15.40483 |
| 6  | 3   | 3   | 6   | 1    | 5    | 4308.00000  | 4300.91084  | 7.08916   |
| 6  | 3   | 4   | 5   | 1    | 4    | 9224.60000  | 9244.43859  | -19.83859 |
| 6  | 2   | 5   | 5   | 2    | 3    | 4068.20000  | 4054.40489  | 13.79511  |
| 6  | 4   | 3   | 6   | 2    | 5    | 7335.90000  | 7332.52274  | 3.37726   |
| 6  | 3   | 3   | 5   | 3    | 3    | 6166.70000  | 6157.25117  | 9.44883   |
| 7  | 5   | 3   | 6   | 3    | 3    | 14752.80000 | 14744.08613 | 8.71387   |
| 7  | 3   | 4   | 5   | 3    | 2    | 12996.00000 | 12995.98782 | 0.01218   |
| 7  | 5   | 2   | 7   | 3    | 4    | 7683.70000  | 7699.27063  | -15.57063 |
| 7  | 6   | 2   | 6   | 6    | 0    | 6556.50000  | 6556.18330  | 0.31670   |
| 7  | 6   | 1   | 6   | 6    | 1    | 6556.50000  | 6556.43862  | 0.06138   |
| 7  | 7   | 1   | 5   | 5    | 1    | 25170.60000 | 25191.80348 | -21.20348 |
| 7  | 7   | 0   | 5   | 5    | 0    | 25170.60000 | 25191.64943 | -21.04943 |
| 7  | 1   | 6   | 6   | 1    | 6    | 9770.20000  | 9774.81586  | -4.61586  |
| 8  | 1   | 8   | 7   | 1    | 6    | 1678.80000  | 1708.66437  | -29.86437 |
| 7  | 2   | 5   | 7   | 0    | 7    | 7416.90000  | 7414.97381  | 1.92619   |
| 8  | 2   | 7   | 7   | 2    | 5    | 3873.30000  | 3912.13483  | -38.83483 |
| 8  | 0   | 8   | 6   | 0    | 6    | 11467.10000 | 11494.60522 | -27.50522 |
| 7  | 1   | 6   | 6   | 3    | 4    | 2416.30000  | 2444.53741  | -28.23741 |
| 7  | 3   | 4   | 7   | 1    | 6    | 5186.40000  | 5166.61248  | 19.78752  |
| 8  | 3   | 6   | 7   | 3    | 4    | 6172.70000  | 6215.40107  | -42.70107 |
| 7  | 4   | 3   | 7   | 2    | 5    | 5210.40000  | 5195.45201  | 14.94799  |
| 8  | 2   | 6   | 7   | 4    | 4    | 2683.10000  | 2711.75421  | -28.65421 |
| 7  | 5   | 2   | 7   | 3    | 4    | 7701.70000  | 7699.27063  | 2.42937   |
| 8  | 5   | 4   | 7   | 5    | 2    | 7557.80000  | 7562.41967  | -4.61967  |
| 8  | 5   | 3   | 7   | 5    | 3    | 7590.70000  | 7612.11408  | -21.41408 |
| 8  | 6   | 3   | 7   | 4    | 3    | 18077.50000 | 18090.44459 | -12.94459 |
| 8  | 6   | 2   | 7   | 4    | 4    | 18239.40000 | 18264.67704 | -25.27704 |
| 9  | 2   | 8   | 8   | 2    | 6    | 3687.40000  | 3707.90945  | -20.50945 |
| 9  | 1   | 8   | 8   | 3    | 6    | 3018.90000  | 3053.46573  | -34.56573 |
| 8  | 4   | 4   | 8   | 2    | 6    | 5330.30000  | 5310.44042  | 19.85958  |
| 9  | 4   | 6   | 8   | 4    | 4    | 8034.40000  | 8048.02379  | -13.62379 |
| 9  | 2   | 7   | 8   | 2    | 7    | 12213.50000 | 12260.07104 | -46.57104 |
| 8  | 5   | 3   | 8   | 3    | 5    | 7186.00000  | 7183.87940  | 2.12060   |
| 8  | 5   | 4   | 7   | 3    | 4    | 15268.40000 | 15261.69030 | 6.70970   |
| 8  | 6   | 2   | 8   | 4    | 4    | 10210.90000 | 10242.48241 | -31.58241 |
| 9  | 6   | 3   | 8   | 4    | 5    | 19174.70000 | 19200.76076 | -26.06076 |
| 8  | 7   | 1   | 8   | 5    | 3    | 12822.10000 | 12850.19246 | -28.09246 |
| 9  | 8   | 2   | 8   | 6    | 2    | 23563.70000 | 23574.28235 | -10.58235 |
| 9  | 8   | 1   | 8   | 6    | 3    | 23563.70000 | 23575.89826 | -12.19826 |
| 9  | 9   | 1   | 7   | 7    | 1    | 33333.90000 | 33278.27188 | 55.62812  |
| 9  | 9   | 0   | 7   | 7    | 0    | 33333.90000 | 33278.26979 | 55.63021  |
| 10 | 1   | 10  | 8   | 1    | 8    | 14333.10000 | 14358.99450 | -25.89450 |
| 10 | 2   | 9   | 8   | 2    | 7    | 15751.10000 | 15785.76331 | -34.66331 |
| 10 | 0   | 10  | 8   | 0    | 8    | 14333.10000 | 14360.48305 | -27.38305 |
| 10 | 3   | 8   | 9   | 3    | 6    | 6058.80000  | 6081.00692  | -22.20692 |
| 9  | 3   | 7   | 8   | 1    | 7    | 12660.20000 | 12660.61694 | -0.41694  |
| 9  | 4   | 5   | 9   | 2    | 7    | 5893.90000  | 5873.97883  | 19.92117  |
| 10 | 4   | 7   | 9   | 4    | 5    | 8400.20000  | 8435.61796  | -35.41796 |
| 10 | 2   | 8   | 9   | 4    | 6    | 4137.10000  | 4180.03288  | -42.93288 |
| 9  | 5   | 4   | 9   | 3    | 6    | 6739.30000  | 6735.90213  | 3.39787   |
| 10 | 5   | 6   | 9   | 5    | 4    | 9389.50000  | 9404.55079  | -15.05079 |
| 9  | 6   | 3   | 9   | 4    | 5    | 9725.30000  | 9749.25715  | -23.95715 |
| 10 | 6   | 4   | 9   | 6    | 4    | 9548.40000  | 9520.55131  | 27.84869  |
| 10 | 7   | 4   | 9   | 7    | 2    | 9419.50000  | 9427.37351  | -7.87351  |
| 9  | 7   | 3   | 8   | 5    | 3    | 21300.30000 | 21302.86343 | -2.56343  |

|                 |             |             |           |
|-----------------|-------------|-------------|-----------|
| 9 8 1 9 6 3     | 15040.60000 | 15066.35302 | -25.75302 |
| 10 8 3 9 8 1    | 9428.50000  | 9382.90842  | 45.59158  |
| 9 8 2 9 6 4     | 15040.60000 | 15074.09012 | -33.49012 |
| 10 8 2 9 8 2    | 9428.50000  | 9382.94661  | 45.55339  |
| 10 10 1 8 8 1   | 37375.10000 | 37321.49278 | 53.60722  |
| 10 10 0 8 8 0   | 37375.10000 | 37321.49255 | 53.60745  |
| 11 1 11 9 1 9   | 15763.10000 | 15795.10636 | -32.00636 |
| 11 2 10 9 2 8   | 17214.10000 | 17231.31950 | -17.21950 |
| 11 0 11 9 0 9   | 15763.10000 | 15795.62681 | -32.52681 |
| 10 3 7 10 1 9   | 9635.30000  | 9626.35434  | 8.94566   |
| 11 3 9 10 3 7   | 5807.00000  | 5802.81411  | 4.18589   |
| 10 3 8 9 1 8    | 14012.30000 | 14022.08124 | -9.78124  |
| 10 4 6 10 2 8   | 6916.20000  | 6908.90810  | 7.29190   |
| 11 4 8 10 4 6   | 8505.10000  | 8537.50312  | -32.40312 |
| 11 2 9 10 4 7   | 4562.80000  | 4559.91916  | 2.88084   |
| 10 5 5 10 3 7   | 6532.50000  | 6525.58820  | 6.91180   |
| 10 6 4 10 4 6   | 9113.70000  | 9126.26116  | -12.56116 |
| 11 6 6 10 6 4   | 10438.80000 | 10459.09398 | -20.29398 |
| 10 6 5 10 4 7   | 10768.50000 | 10797.21371 | -28.71371 |
| 11 6 5 10 6 5   | 10573.70000 | 10580.00761 | -6.30761  |
| 10 7 3 10 5 5   | 12297.50000 | 12342.61104 | -45.11104 |
| 11 7 5 10 7 3   | 10441.80000 | 10412.48122 | 29.31878  |
| 10 5 6 9 5 4    | 9437.50000  | 9404.55079  | 32.94921  |
| 11 11 1 9 9 1   | 41395.30000 | 41364.70000 | 30.60000  |
| 11 11 0 9 9 0   | 41395.30000 | 41364.69998 | 30.60002  |
| 12 1 12 10 1 10 | 17214.10000 | 17230.99253 | -16.89253 |
| 11 0 11 10 2 9  | 1612.90000  | 1609.08607  | 3.81393   |
| 12 2 11 11 0 11 | 17061.20000 | 17061.31012 | -0.11012  |
| 12 0 12 10 0 10 | 17214.10000 | 17231.17074 | -17.07074 |
| 11 3 8 11 1 10  | 11338.20000 | 11347.67880 | -9.47880  |
| 12 3 10 11 3 8  | 5510.20000  | 5510.72464  | -0.52464  |
| 11 3 9 11 1 11  | 13790.50000 | 13810.49186 | -19.99186 |
| 12 1 11 11 3 9  | 3270.70000  | 3249.40767  | 21.29233  |
| 11 5 7 11 3 9   | 10870.50000 | 10874.72024 | -4.22024  |
| 12 3 9 11 5 7   | 5399.30000  | 5394.67880  | 4.62120   |
| 12 5 7 12 3 9   | 7491.80000  | 7454.13678  | 37.66322  |
| 11 6 6 11 4 8   | 11020.40000 | 11047.85202 | -27.45202 |
| 12 8 5 11 8 3   | 11392.10000 | 11335.56971 | 56.53029  |
| 11 8 4 11 6 6   | 14794.80000 | 14831.73388 | -36.93388 |
| 12 8 4 11 8 4   | 11392.10000 | 11336.79935 | 55.30065  |
| 11 7 4 10 7 4   | 10435.80000 | 10419.55784 | 16.24216  |
| 11 9 2 11 7 4   | 17148.10000 | 17156.78035 | -8.68035  |
| 12 9 4 11 9 2   | 11308.20000 | 11282.53772 | 25.66228  |
| 11 7 5 10 7 3   | 10435.80000 | 10412.48122 | 23.31878  |
| 11 9 3 11 7 5   | 17148.10000 | 17162.51835 | -14.41835 |
| 12 9 3 11 9 3   | 11308.20000 | 11282.57368 | 25.62632  |
| 11 8 3 10 8 3   | 10354.80000 | 10354.58801 | 0.21199   |
| 11 10 1 11 8 3  | 19468.50000 | 19448.92939 | 19.57061  |
| 12 10 3 11 10 1 | 11251.20000 | 11245.16597 | 6.03403   |
| 11 8 4 10 8 2   | 10354.80000 | 10354.34244 | 0.45756   |
| 11 10 2 11 8 4  | 19468.50000 | 19449.14060 | 19.35940  |
| 12 10 2 11 10 2 | 11251.20000 | 11245.16661 | 6.03339   |
| 12 12 1 10 10 1 | 45421.60000 | 45407.89845 | 13.70155  |
| 12 12 0 10 10 0 | 45421.60000 | 45407.89845 | 13.70155  |
| 13 1 13 11 1 11 | 18674.10000 | 18666.82126 | 7.27874   |
| 12 2 10 11 2 10 | 16803.40000 | 16822.29004 | -18.89004 |
| 13 2 12 12 2 10 | 3300.70000  | 3284.50518  | 16.19482  |
| 13 0 13 11 0 11 | 18674.10000 | 18666.88128 | 7.21872   |
| 13 3 11 12 1 11 | 18293.30000 | 18297.00473 | -3.70473  |
| 12 3 10 11 1 10 | 16842.30000 | 16858.40345 | -16.10345 |
| 13 4 10 12 4 8  | 8067.40000  | 8068.24679  | -0.84679  |
| 12 3 9 11 5 7   | 5408.30000  | 5394.67880  | 13.62120  |
| 12 5 7 12 3 9   | 7452.80000  | 7454.13678  | -1.33678  |
| 13 5 9 12 5 7   | 10852.50000 | 10879.26487 | -26.76487 |
| 12 5 8 12 3 10  | 11856.80000 | 11883.98099 | -27.18099 |
| 13 3 10 12 5 8  | 5995.80000  | 5985.45194  | 10.34806  |
| 12 6 6 12 4 8   | 7968.50000  | 7981.47954  | -12.97954 |
| 12 6 7 11 6 5   | 11368.10000 | 11393.72404 | -25.62404 |
| 12 7 5 12 5 7   | 11152.30000 | 11186.25634 | -33.95634 |
| 12 8 4 12 6 6   | 14414.00000 | 14437.77587 | -23.77587 |
| 13 8 6 12 8 4   | 12354.40000 | 12327.08583 | 27.31417  |
| 13 9 5 12 7 5   | 29286.70000 | 29272.97259 | 13.72741  |
| 13 10 4 12 10 2 | 12210.50000 | 12211.79843 | -1.29843  |
| 13 10 3 12 10 3 | 12210.50000 | 12211.80345 | -1.30345  |
| 12 9 3 11 9 3   | 11293.20000 | 11282.57368 | 10.62632  |
| 12 11 1 12 9 3  | 21633.00000 | 21633.51161 | -0.51161  |
| 13 11 3 12 11 1 | 12186.60000 | 12176.87504 | 9.72496   |
| 12 9 4 11 9 2   | 11293.20000 | 11282.53772 | 10.66228  |

|                 |             |             |           |
|-----------------|-------------|-------------|-----------|
| 12 11 2 12 9 4  | 21633.00000 | 21633.54297 | -0.54297  |
| 13 11 2 12 11 2 | 12186.60000 | 12176.87512 | 9.72488   |
| 13 12 2 11 10 2 | 47268.30000 | 47273.25675 | -4.95675  |
| 13 13 1 11 11 1 | 49471.80000 | 49451.09118 | 20.70882  |
| 13 13 0 11 11 0 | 49471.80000 | 49451.09118 | 20.70882  |
| 13 1 12 12 1 12 | 18491.20000 | 18498.61635 | -7.41635  |
| 14 1 14 13 1 12 | 1612.90000  | 1604.03058  | 8.86942   |
| 14 2 13 12 2 11 | 21534.10000 | 21542.25574 | -8.15574  |
| 13 2 12 12 0 12 | 18491.20000 | 18499.12539 | -7.92539  |
| 14 0 14 13 2 12 | 1612.90000  | 1603.54149  | 9.35851   |
| 14 1 13 12 1 11 | 21534.10000 | 21543.42586 | -9.32586  |
| 13 4 9 12 4 9   | 16695.40000 | 16710.56655 | -15.16655 |
| 14 4 11 13 4 9  | 7665.70000  | 7676.21022  | -10.51022 |
| 13 4 10 12 2 10 | 18065.50000 | 18088.76596 | -23.26596 |
| 14 5 10 13 5 8  | 10768.50000 | 10796.66104 | -28.16104 |
| 14 3 11 13 5 9  | 6355.60000  | 6345.53835  | 10.06165  |
| 13 6 7 13 4 9   | 7821.60000  | 7814.70046  | 6.89954   |
| 14 4 10 13 4 10 | 18521.20000 | 18551.78410 | -30.58410 |
| 13 7 6 13 5 8   | 10381.80000 | 10413.56306 | -31.76306 |
| 14 8 6 13 6 8   | 27907.70000 | 27884.90639 | 22.79361  |
| 13 7 6 12 7 6   | 12504.30000 | 12481.69885 | 22.60115  |
| 13 9 4 13 7 6   | 16791.40000 | 16812.00358 | -20.60358 |
| 14 9 6 13 9 4   | 13265.80000 | 13246.49576 | 19.30424  |
| 13 9 5 12 7 5   | 29259.70000 | 29272.97259 | -13.27259 |
| 14 9 5 13 9 5   | 13265.80000 | 13247.40193 | 18.39807  |
| 13 8 5 12 8 5   | 12336.50000 | 12332.18310 | 4.31690   |
| 13 10 3 13 8 5  | 19240.70000 | 19238.14600 | 2.55400   |
| 14 10 5 13 10 3 | 13190.90000 | 13185.85566 | 5.04434   |
| 13 8 6 12 8 4   | 12336.50000 | 12327.08583 | 9.41417   |
| 13 10 4 13 8 6  | 19240.70000 | 19242.22046 | -1.52046  |
| 14 10 4 13 10 4 | 13190.90000 | 13185.88591 | 5.01409   |
| 13 9 4 12 9 4   | 12285.50000 | 12260.00491 | 25.49509  |
| 13 9 5 12 9 3   | 12285.50000 | 12259.80636 | 25.69364  |
| 13 10 3 12 10 3 | 12222.50000 | 12211.80345 | 10.69655  |
| 13 12 1 13 10 3 | 23800.50000 | 23816.28728 | -15.78728 |
| 14 12 3 13 12 1 | 13136.90000 | 13108.83092 | 28.06908  |
| 13 10 4 12 10 2 | 12222.50000 | 12211.79843 | 10.70157  |
| 13 12 2 13 10 4 | 23800.50000 | 23816.29170 | -15.79170 |
| 14 12 2 13 12 2 | 13136.90000 | 13108.83093 | 28.06907  |
| 14 13 2 12 11 2 | 51339.50000 | 51316.57834 | 22.92166  |
| 14 13 1 12 11 1 | 51339.50000 | 51316.57834 | 22.92166  |
| 14 14 1 12 12 1 | 53495.00000 | 53494.28004 | 0.71996   |
| 14 14 0 12 12 0 | 53495.00000 | 53494.28004 | 0.71996   |
| 15 1 15 13 1 13 | 21534.10000 | 21538.48401 | -4.38401  |
| 14 0 14 13 2 12 | 1576.90000  | 1603.54149  | -26.64149 |
| 14 2 12 14 0 14 | 18113.50000 | 18129.45850 | -15.95850 |
| 15 2 14 14 2 12 | 3264.70000  | 3244.48504  | 20.21496  |
| 15 0 15 13 0 13 | 21534.10000 | 21538.49056 | -4.39056  |
| 14 1 14 13 1 12 | 1576.90000  | 1604.03058  | -27.13058 |
| 14 3 12 14 1 14 | 18113.50000 | 18134.75890 | -21.25890 |
| 15 1 14 14 3 12 | 3264.70000  | 3239.12163  | 25.57837  |
| 14 4 10 13 4 10 | 18524.20000 | 18551.78410 | -27.58410 |
| 14 5 9 14 3 11  | 10273.90000 | 10282.07851 | -8.17851  |
| 14 6 8 14 4 10  | 8151.40000  | 8154.04626  | -2.64626  |
| 15 6 10 14 6 8  | 13220.80000 | 13223.21540 | -2.41540  |
| 14 7 7 14 5 9   | 9671.30000  | 9677.81432  | -6.51432  |
| 15 5 10 14 7 8  | 5678.10000  | 5674.05210  | 4.04790   |
| 15 7 8 15 5 10  | 9191.60000  | 9169.57420  | 22.02580  |
| 14 8 6 14 6 8   | 13298.80000 | 13318.15640 | -19.35640 |
| 15 8 8 14 8 6   | 14354.10000 | 14332.06027 | 22.03973  |
| 14 6 9 13 6 7   | 12882.10000 | 12865.78731 | 16.31269  |
| 14 10 4 13 8 6  | 32434.60000 | 32428.10638 | 6.49362   |
| 15 10 6 14 10 4 | 14186.20000 | 14168.12831 | 18.07169  |
| 14 10 5 13 8 5  | 32434.60000 | 32424.00166 | 10.59834  |
| 15 10 5 14 10 5 | 14186.20000 | 14168.27887 | 17.92113  |
| 14 12 2 13 10 4 | 36913.50000 | 36925.12264 | -11.62264 |
| 15 12 4 14 12 2 | 14105.20000 | 14072.44074 | 32.75926  |
| 14 12 3 13 10 3 | 36913.50000 | 36925.11820 | -11.61820 |
| 15 12 3 14 12 3 | 14105.20000 | 14072.44083 | 32.75917  |
| 14 13 1 13 11 3 | 39146.90000 | 39139.70330 | 7.19670   |
| 15 13 3 14 13 1 | 14027.30000 | 14040.97100 | -13.67100 |
| 15 13 2 13 11 2 | 53174.20000 | 53180.67422 | -6.47422  |
| 14 12 2 13 12 2 | 13091.90000 | 13108.83093 | -16.93093 |
| 15 14 2 14 12 2 | 42264.70000 | 42251.03377 | 13.66623  |
| 14 12 3 13 12 1 | 13091.90000 | 13108.83092 | -16.93092 |
| 15 14 1 14 12 3 | 42264.70000 | 42251.03378 | 13.66622  |
| 15 15 1 13 13 1 | 57515.20000 | 57537.46619 | -22.26619 |
| 15 15 0 13 13 0 | 57515.20000 | 57537.46619 | -22.26619 |

|    |    |    |    |    |    |             |             |           |
|----|----|----|----|----|----|-------------|-------------|-----------|
| 16 | 1  | 16 | 14 | 1  | 14 | 22955.10000 | 22974.33420 | -19.23420 |
| 15 | 0  | 15 | 14 | 2  | 13 | 1582.90000  | 1601.80598  | -18.90598 |
| 16 | 2  | 15 | 15 | 0  | 15 | 22799.20000 | 22810.92860 | -11.72860 |
| 16 | 0  | 16 | 14 | 0  | 14 | 22955.10000 | 22974.33633 | -19.23633 |
| 15 | 1  | 14 | 14 | 3  | 12 | 3213.80000  | 3239.12163  | -25.32163 |
| 15 | 3  | 12 | 15 | 1  | 14 | 17633.80000 | 17654.92544 | -21.12544 |
| 16 | 3  | 14 | 15 | 3  | 12 | 4985.50000  | 4968.01123  | 17.48877  |
| 15 | 1  | 15 | 14 | 1  | 13 | 1582.90000  | 1601.97988  | -19.07988 |
| 16 | 1  | 15 | 15 | 1  | 15 | 22799.20000 | 22810.90688 | -11.70688 |
| 16 | 4  | 13 | 15 | 4  | 11 | 7060.10000  | 7041.12169  | 18.97831  |
| 15 | 4  | 12 | 15 | 2  | 14 | 17669.80000 | 17692.79616 | -22.99616 |
| 16 | 2  | 14 | 15 | 4  | 12 | 4949.60000  | 4929.30433  | 20.29567  |
| 15 | 3  | 12 | 14 | 5  | 10 | 6529.50000  | 6541.39007  | -11.89007 |
| 15 | 5  | 10 | 15 | 3  | 12 | 12105.60000 | 12115.98755 | -10.38755 |
| 16 | 5  | 12 | 15 | 5  | 10 | 10001.10000 | 10016.68701 | -15.58701 |
| 15 | 3  | 13 | 14 | 3  | 11 | 5009.50000  | 5025.59047  | -16.09047 |
| 15 | 5  | 11 | 15 | 3  | 13 | 15712.10000 | 15733.26388 | -21.16388 |
| 16 | 3  | 13 | 15 | 5  | 11 | 6637.40000  | 6631.00373  | 6.39627   |
| 16 | 6  | 11 | 15 | 6  | 9  | 13268.80000 | 13255.19129 | 13.60871  |
| 15 | 6  | 10 | 15 | 4  | 12 | 14048.30000 | 14063.02535 | -14.72535 |
| 16 | 4  | 12 | 15 | 6  | 10 | 7833.60000  | 7836.12547  | -2.52547  |
| 15 | 7  | 8  | 15 | 5  | 10 | 9161.70000  | 9169.57420  | -7.87420  |
| 15 | 7  | 9  | 15 | 5  | 11 | 13451.70000 | 13466.59993 | -14.89993 |
| 15 | 8  | 7  | 15 | 6  | 9  | 12459.40000 | 12486.59062 | -27.19062 |
| 15 | 8  | 8  | 14 | 6  | 8  | 27637.90000 | 27650.21667 | -12.31667 |
| 15 | 9  | 6  | 15 | 7  | 8  | 16065.90000 | 16095.24687 | -29.34687 |
| 15 | 9  | 7  | 15 | 7  | 9  | 16482.60000 | 16499.61970 | -17.01970 |
| 16 | 10 | 7  | 15 | 10 | 5  | 15175.50000 | 15159.44540 | 16.05460  |
| 15 | 10 | 6  | 15 | 8  | 8  | 18922.90000 | 18918.28211 | 4.61789   |
| 16 | 10 | 6  | 15 | 10 | 6  | 15175.50000 | 15160.08815 | 15.41185  |
| 15 | 9  | 6  | 14 | 9  | 6  | 14249.10000 | 14246.79734 | 2.30266   |
| 15 | 11 | 4  | 15 | 9  | 6  | 21315.20000 | 21312.31014 | 2.88986   |
| 16 | 11 | 6  | 15 | 11 | 4  | 15112.50000 | 15092.05172 | 20.44828  |
| 15 | 9  | 7  | 14 | 9  | 5  | 14249.10000 | 14243.24635 | 5.85365   |
| 15 | 11 | 5  | 15 | 9  | 7  | 21315.20000 | 21315.11834 | 0.08166   |
| 16 | 11 | 5  | 15 | 11 | 5  | 15112.50000 | 15092.07540 | 20.42460  |
| 15 | 12 | 3  | 14 | 10 | 5  | 37791.80000 | 37811.70337 | -19.90337 |
| 16 | 12 | 5  | 15 | 12 | 3  | 15064.60000 | 15041.90345 | 22.69655  |
| 15 | 12 | 4  | 14 | 10 | 4  | 37791.80000 | 37811.67747 | -19.87747 |
| 16 | 12 | 4  | 15 | 12 | 4  | 15064.60000 | 15041.90406 | 22.69594  |
| 16 | 13 | 4  | 14 | 11 | 4  | 55035.90000 | 55042.30109 | -6.40109  |
| 16 | 13 | 3  | 14 | 11 | 3  | 55035.90000 | 55042.30050 | -6.40050  |
| 16 | 14 | 2  | 14 | 12 | 2  | 57221.40000 | 57224.28590 | -2.88590  |
| 16 | 15 | 2  | 14 | 13 | 2  | 59397.90000 | 59403.12641 | -5.22641  |
| 16 | 15 | 1  | 14 | 13 | 1  | 59397.90000 | 59403.12641 | -5.22641  |
| 16 | 16 | 1  | 14 | 14 | 1  | 61580.40000 | 61580.65038 | -0.25038  |
| 16 | 16 | 0  | 14 | 14 | 0  | 61580.40000 | 61580.65038 | -0.25038  |
| 16 | 1  | 15 | 15 | 1  | 15 | 22805.20000 | 22810.90688 | -5.70688  |
| 17 | 1  | 17 | 16 | 1  | 15 | 1576.90000  | 1599.28890  | -22.38890 |
| 17 | 2  | 16 | 15 | 2  | 14 | 25833.10000 | 25848.07460 | -14.97460 |
| 17 | 0  | 17 | 15 | 0  | 15 | 24382.10000 | 24410.19646 | -28.09646 |
| 16 | 1  | 15 | 15 | 3  | 13 | 3201.80000  | 3231.79077  | -29.99077 |
| 16 | 3  | 13 | 16 | 1  | 15 | 19138.80000 | 19132.47684 | 6.32316   |
| 17 | 3  | 15 | 16 | 3  | 13 | 4913.60000  | 4931.56352  | -17.96352 |
| 17 | 1  | 16 | 15 | 1  | 14 | 25833.10000 | 25848.12808 | -15.02808 |
| 16 | 2  | 14 | 15 | 4  | 12 | 4919.60000  | 4929.30433  | -9.70433  |
| 16 | 2  | 15 | 15 | 2  | 13 | 3201.80000  | 3233.86264  | -32.06264 |
| 16 | 4  | 13 | 16 | 2  | 15 | 19138.80000 | 19148.49275 | -9.69275  |
| 17 | 2  | 15 | 16 | 4  | 13 | 4913.60000  | 4915.23895  | -1.63895  |
| 16 | 5  | 11 | 16 | 3  | 13 | 14018.30000 | 14023.14671 | -4.84671  |
| 17 | 5  | 13 | 16 | 5  | 11 | 9521.40000  | 9530.75614  | -9.35614  |
| 16 | 6  | 10 | 16 | 4  | 12 | 10480.70000 | 10486.31027 | -5.61027  |
| 17 | 4  | 13 | 16 | 6  | 11 | 8199.30000  | 8165.79582  | 33.50418  |
| 16 | 7  | 9  | 16 | 5  | 11 | 9080.70000  | 9095.25999  | -14.55999 |
| 17 | 7  | 11 | 16 | 7  | 9  | 15511.30000 | 15529.17006 | -17.87006 |
| 16 | 7  | 10 | 15 | 5  | 10 | 24172.30000 | 24188.56330 | -16.26330 |
| 16 | 8  | 9  | 16 | 6  | 11 | 14530.90000 | 14556.47973 | -25.57973 |
| 16 | 9  | 7  | 15 | 7  | 9  | 31733.00000 | 31761.57233 | -28.57233 |
| 17 | 9  | 9  | 16 | 9  | 7  | 16296.70000 | 16262.73724 | 33.96276  |
| 16 | 9  | 8  | 16 | 7  | 10 | 16302.70000 | 16325.96059 | -23.26059 |
| 16 | 10 | 7  | 16 | 8  | 9  | 18716.00000 | 18710.00431 | 5.99569   |
| 16 | 9  | 7  | 15 | 9  | 7  | 15247.40000 | 15261.95263 | -14.55263 |
| 16 | 11 | 5  | 16 | 9  | 7  | 21153.40000 | 21145.24111 | 8.15889   |
| 17 | 11 | 7  | 16 | 11 | 5  | 16086.90000 | 16078.65986 | 8.24014   |
| 16 | 9  | 8  | 15 | 9  | 6  | 15247.40000 | 15249.70281 | -2.30281  |
| 16 | 11 | 6  | 16 | 9  | 8  | 21153.40000 | 21154.65905 | -1.25905  |
| 17 | 11 | 6  | 16 | 11 | 6  | 16086.90000 | 16078.76914 | 8.13086   |
| 16 | 10 | 6  | 15 | 10 | 6  | 15148.50000 | 15160.08815 | -11.58815 |

|                 |             |             |           |
|-----------------|-------------|-------------|-----------|
| 16 12 4 16 10 6 | 23518.70000 | 23525.36507 | -6.66507  |
| 17 12 6 16 12 4 | 16032.90000 | 16017.74222 | 15.15778  |
| 16 10 7 15 10 5 | 15148.50000 | 15159.44540 | -10.94540 |
| 16 12 5 16 10 7 | 23518.70000 | 23525.88255 | -7.18255  |
| 17 12 5 16 12 5 | 16032.90000 | 16017.74578 | 15.15422  |
| 16 11 5 15 11 5 | 15073.60000 | 15092.07540 | -18.47540 |
| 17 11 7 16 11 5 | 16074.90000 | 16078.65986 | -3.75986  |
| 17 13 5 17 11 7 | 25740.20000 | 25729.46262 | 10.73738  |
| 16 11 6 15 11 4 | 15073.60000 | 15092.05172 | -18.45172 |
| 17 11 6 16 11 6 | 16074.90000 | 16078.76914 | -3.86914  |
| 17 13 4 17 11 6 | 25740.20000 | 25729.37330 | 10.82670  |
| 16 12 4 15 12 4 | 15022.60000 | 15041.90406 | -19.30406 |
| 16 12 5 15 12 3 | 15022.60000 | 15041.90345 | -19.30345 |
| 17 1 16 16 1 16 | 24235.20000 | 24247.67442 | -12.47442 |
| 18 1 18 17 1 16 | 1597.90000  | 1598.39209  | -0.49209  |
| 17 2 15 16 2 15 | 24046.40000 | 24063.73170 | -17.33170 |
| 18 2 17 17 2 15 | 3207.80000  | 3219.77937  | -11.97937 |
| 17 2 16 16 0 16 | 24235.20000 | 24247.68182 | -12.48182 |
| 18 0 18 17 2 16 | 1597.90000  | 1598.38490  | -0.48490  |
| 18 3 16 16 3 14 | 28699.10000 | 28729.59951 | -30.49951 |
| 17 3 15 16 1 15 | 24046.40000 | 24064.04036 | -17.64036 |
| 18 1 17 17 3 15 | 3207.80000  | 3219.48924  | -11.68924 |
| 18 2 16 16 2 14 | 28699.10000 | 28730.27006 | -31.17006 |
| 17 5 12 16 5 12 | 22517.40000 | 22539.93304 | -22.53304 |
| 17 6 12 16 4 12 | 23452.80000 | 23475.83363 | -23.03363 |
| 18 4 14 17 6 12 | 8361.20000  | 8334.46325  | 26.73675  |
| 17 8 9 17 6 11  | 10765.50000 | 10798.03908 | -32.53908 |
| 17 6 12 16 6 10 | 13005.00000 | 12989.52336 | 15.47664  |
| 17 8 10 17 6 12 | 14842.70000 | 14873.19307 | -30.49307 |
| 17 7 11 16 7 9  | 15541.20000 | 15529.17006 | 12.02994  |
| 17 9 9 17 7 11  | 16191.80000 | 16212.32900 | -20.52900 |
| 17 8 9 16 8 9   | 16665.50000 | 16673.47878 | -7.97878  |
| 17 10 7 17 8 9  | 18209.40000 | 18199.46254 | 9.93746   |
| 18 10 9 17 10 7 | 17187.10000 | 17171.49591 | 15.60409  |
| 17 10 8 16 8 8  | 34748.90000 | 34754.95925 | -6.05925  |
| 18 10 8 17 10 8 | 17190.10000 | 17179.62602 | 10.47398  |
| 18 11 8 17 11 6 | 17088.20000 | 17073.94317 | 14.25683  |
| 17 11 7 17 9 9  | 20961.50000 | 20961.16373 | 0.33627   |
| 18 11 7 17 11 7 | 17088.20000 | 17074.38668 | 13.81332  |
| 17 12 5 16 10 7 | 39509.70000 | 39543.62833 | -33.92833 |
| 18 12 7 17 12 5 | 17019.20000 | 17000.53738 | 18.66262  |
| 17 12 6 16 10 6 | 39509.70000 | 39543.10730 | -33.40730 |
| 18 12 6 17 12 6 | 17019.20000 | 17000.55502 | 18.64498  |
| 17 11 6 16 11 6 | 16062.90000 | 16078.76914 | -15.86914 |
| 18 13 6 17 11 6 | 42675.50000 | 42674.12262 | 1.37738   |
| 17 11 7 16 11 5 | 16062.90000 | 16078.65986 | -15.75986 |
| 18 13 5 17 11 7 | 42675.50000 | 42674.21246 | 1.28754   |
| 17 14 3 16 12 5 | 44027.50000 | 44044.74901 | -17.24901 |
| 18 14 5 17 14 3 | 16905.30000 | 16901.18552 | 4.11448   |
| 17 14 4 16 12 4 | 44027.50000 | 44044.74847 | -17.24847 |
| 18 14 4 17 14 4 | 16905.30000 | 16901.18554 | 4.11446   |
| 18 15 4 16 13 4 | 63142.30000 | 63130.73529 | 11.56471  |
| 18 15 3 16 13 3 | 63142.30000 | 63130.73528 | 11.56472  |
| 18 3 15 17 3 15 | 25272.50000 | 25275.20268 | -2.70268  |
| 19 3 17 18 3 15 | 4868.60000  | 4888.41241  | -19.81241 |
| 18 3 16 17 1 16 | 25482.40000 | 25504.40809 | -22.00809 |
| 19 1 18 18 3 16 | 3216.80000  | 3214.62938  | 2.17062   |
| 18 4 14 18 2 16 | 20047.10000 | 20049.87331 | -2.77331  |
| 18 4 15 17 2 15 | 25272.50000 | 25278.11378 | -5.61378  |
| 19 2 17 18 4 15 | 4868.60000  | 4885.75124  | -17.15124 |
| 18 5 13 17 5 13 | 24268.20000 | 24288.82490 | -20.62490 |
| 19 5 15 18 5 13 | 8840.90000  | 8813.81217  | 27.08783  |
| 18 6 12 18 4 14 | 14219.20000 | 14232.54705 | -13.34705 |
| 18 6 12 17 8 10 | 7704.70000  | 7693.81723  | 10.88277  |
| 18 8 10 18 6 12 | 10309.90000 | 10329.73726 | -19.83726 |
| 18 8 11 18 6 13 | 15385.40000 | 15408.97725 | -23.57725 |
| 18 9 10 18 7 12 | 16203.80000 | 16209.03943 | -5.23943  |
| 19 7 12 18 9 10 | 5872.90000  | 5852.98725  | 19.91275  |
| 19 9 10 19 7 12 | 12693.20000 | 12674.30461 | 18.89539  |
| 18 8 11 17 8 9  | 17091.20000 | 17119.90606 | -28.70606 |
| 18 10 9 18 8 11 | 18257.40000 | 18251.05239 | 6.34761   |
| 18 9 9 17 9 9   | 17355.00000 | 17378.62266 | -23.62266 |
| 18 11 7 18 9 9  | 20667.70000 | 20656.92775 | 10.77225  |
| 18 11 8 18 9 10 | 20742.60000 | 20733.97901 | 8.62099   |
| 18 12 6 17 10 8 | 40358.10000 | 40383.14021 | -25.04021 |
| 19 12 8 18 12 6 | 18011.50000 | 17990.93729 | 20.56271  |
| 18 12 7 17 10 7 | 40358.10000 | 40381.22870 | -23.12870 |
| 19 12 7 18 12 7 | 18011.50000 | 17991.01414 | 20.48586  |



|                   |             |             |           |
|-------------------|-------------|-------------|-----------|
| 18 12 6 17 12 6   | 16995.20000 | 17000.55502 | -5.35502  |
| 19 14 6 18 12 6   | 45814.30000 | 45800.38760 | 13.91240  |
| 18 12 7 17 12 5   | 16995.20000 | 17000.53738 | -5.33738  |
| 19 14 5 18 12 7   | 45814.30000 | 45800.40229 | 13.89771  |
| 19 16 4 18 14 4   | 50314.20000 | 50273.44009 | 40.75991  |
| 19 16 3 18 14 5   | 50314.20000 | 50273.44010 | 40.75990  |
| 20 1 20 18 1 18   | 28699.10000 | 28717.82805 | -18.72805 |
| 19 2 17 18 2 17   | 26936.40000 | 26944.08566 | -7.68566  |
| 20 2 19 19 2 17   | 3204.80000  | 3210.53343  | -5.73343  |
| 20 0 20 18 0 18   | 28699.10000 | 28717.82807 | -18.72807 |
| 19 3 16 18 3 16   | 26723.50000 | 26723.81580 | -0.31580  |
| 20 3 18 19 3 16   | 4853.60000  | 4874.10679  | -20.50679 |
| 19 3 17 18 1 17   | 26936.40000 | 26944.12584 | -7.72584  |
| 20 1 19 19 3 17   | 3204.80000  | 3210.49540  | -5.69540  |
| 19 4 16 18 2 16   | 26723.50000 | 26724.94519 | -1.44519  |
| 20 2 18 19 4 16   | 4853.60000  | 4873.06897  | -19.46897 |
| 20 5 16 19 5 14   | 8658.00000  | 8614.14389  | 43.85611  |
| 19 4 15 18 6 13   | 8403.20000  | 8401.40471  | 1.79529   |
| 19 6 13 19 4 15   | 16218.80000 | 16223.84830 | -5.04830  |
| 20 7 14 19 7 12   | 15100.50000 | 15115.92347 | -15.42347 |
| 19 7 13 18 5 13   | 26285.80000 | 26285.72221 | 0.07779   |
| 19 8 11 19 6 13   | 10366.80000 | 10392.20949 | -25.40949 |
| 19 8 12 18 6 12   | 28084.60000 | 28102.53051 | -17.93051 |
| 20 9 12 19 9 10   | 19213.70000 | 19173.51375 | 40.18625  |
| 20 9 11 19 7 13   | 36164.00000 | 36168.20248 | -4.20248  |
| 19 8 11 18 8 11   | 19591.40000 | 19608.48524 | -17.08524 |
| 19 11 8 19 9 10   | 20287.00000 | 20286.94229 | 0.05771   |
| 19 11 9 19 9 11   | 20463.80000 | 20477.86710 | -14.06710 |
| 19 10 9 18 10 9   | 18188.40000 | 18215.61210 | -27.21210 |
| 19 12 7 19 10 9   | 22985.10000 | 22985.13482 | -0.03482  |
| 20 12 9 19 12 7   | 19000.80000 | 18989.65663 | 11.14337  |
| 19 12 8 18 10 8   | 41173.50000 | 41194.45148 | -20.95148 |
| 20 12 8 19 12 8   | 19000.80000 | 18989.95639 | 10.84361  |
| 19 11 8 18 11 8   | 18071.50000 | 18080.25514 | -8.75514  |
| 20 13 8 19 11 8   | 44357.30000 | 44355.25207 | 2.04793   |
| 19 11 9 18 11 7   | 18071.50000 | 18078.64243 | -7.14243  |
| 20 13 7 19 11 9   | 44357.30000 | 44356.52107 | 0.77893   |
| 19 14 5 19 12 7   | 27808.80000 | 27809.38815 | -0.58815  |
| 20 14 7 19 14 5   | 18856.90000 | 18849.89895 | 7.00105   |
| 19 14 6 19 12 8   | 27808.80000 | 27809.45032 | -0.65032  |
| 20 14 6 19 14 6   | 18856.90000 | 18849.89935 | 7.00065   |
| 20 15 6 19 15 4   | 18842.00000 | 18801.51984 | 40.48016  |
| 20 15 5 19 15 5   | 18842.00000 | 18801.51985 | 40.48015  |
| 21 1 21 19 1 19   | 30141.10000 | 30153.71617 | -12.61617 |
| 20 2 18 19 2 18   | 28381.40000 | 28383.27898 | -1.87898  |
| 21 2 20 20 2 18   | 3195.80000  | 3206.98216  | -11.18216 |
| 21 0 21 19 0 19   | 30141.10000 | 30153.71617 | -12.61617 |
| 21 3 19 19 3 17   | 33034.10000 | 33032.49541 | 1.60459   |
| 20 3 18 19 1 18   | 28381.40000 | 28383.29320 | -1.89320  |
| 21 1 20 20 3 18   | 3195.80000  | 3206.96866  | -11.16866 |
| 20 4 16 20 2 18   | 23003.10000 | 23022.75641 | -19.65641 |
| 21 2 19 19 2 17   | 33034.10000 | 33032.52847 | 1.57153   |
| 21 5 17 20 5 15   | 8514.10000  | 8485.58954  | 28.51046  |
| 20 5 16 20 3 18   | 23003.10000 | 23030.16785 | -27.06785 |
| 20 6 14 20 4 16   | 18107.50000 | 18128.97061 | -21.47061 |
| 20 6 15 19 4 15   | 27613.90000 | 27591.86915 | 22.03085  |
| 21 4 17 20 6 15   | 8433.20000  | 8389.63576  | 43.56424  |
| 20 8 12 20 6 14   | 11071.30000 | 11105.72671 | -34.42671 |
| 20 6 15 19 6 13   | 11377.10000 | 11368.02086 | 9.07914   |
| 20 8 13 20 6 15   | 17121.10000 | 17157.06717 | -35.96717 |
| 21 10 12 20 10 10 | 20233.00000 | 20222.14931 | 10.85069  |
| 21 8 13 20 10 11  | 5615.10000  | 5648.57112  | -33.47112 |
| 21 10 11 21 8 13  | 14797.80000 | 14752.49778 | 45.30222  |
| 21 11 10 20 11 10 | 20146.10000 | 20133.07914 | 13.02086  |
| 20 10 10 19 10 10 | 19264.70000 | 19282.02774 | -17.32774 |
| 20 12 8 20 10 10  | 22703.30000 | 22711.60807 | -8.30807  |
| 20 13 7 20 11 9   | 25275.50000 | 25258.01021 | 17.48979  |
| 21 13 9 21 11 11  | 25098.60000 | 25045.68057 | 52.91943  |
| 20 13 8 20 11 10  | 25275.50000 | 25262.06675 | 13.43325  |
| 21 13 8 20 13 8   | 19900.20000 | 19904.67269 | -4.47269  |
| 20 15 5 20 13 7   | 30009.20000 | 30012.51034 | -3.31034  |
| 21 15 7 20 15 5   | 19810.30000 | 19776.52863 | 33.77137  |
| 20 15 6 20 13 8   | 30009.20000 | 30012.52073 | -3.32073  |
| 21 15 6 20 15 6   | 19810.30000 | 19776.52868 | 33.77132  |
| 21 17 5 20 17 3   | 19675.40000 | 19693.42375 | -18.02375 |
| 21 17 4 20 17 4   | 19675.40000 | 19693.42375 | -18.02375 |
| 22 1 22 20 1 20   | 31577.10000 | 31589.60789 | -12.50789 |
| 22 2 21 20 2 19   | 33034.10000 | 33025.94622 | 8.15378   |

|    |    |    |    |    |    |             |             |           |
|----|----|----|----|----|----|-------------|-------------|-----------|
| 22 | 0  | 22 | 20 | 0  | 20 | 31577.10000 | 31589.60789 | -12.50789 |
| 21 | 1  | 20 | 20 | 3  | 18 | 3216.80000  | 3206.96866  | 9.83134   |
| 21 | 3  | 18 | 21 | 1  | 20 | 26399.70000 | 26407.68725 | -7.98725  |
| 22 | 3  | 20 | 21 | 3  | 18 | 4886.60000  | 4852.63394  | 33.96606  |
| 22 | 1  | 21 | 20 | 1  | 19 | 33034.10000 | 33025.94646 | 8.15354   |
| 21 | 2  | 20 | 20 | 2  | 18 | 3216.80000  | 3206.98216  | 9.81784   |
| 21 | 4  | 18 | 21 | 2  | 20 | 26399.70000 | 26407.83502 | -8.13502  |
| 22 | 2  | 20 | 21 | 4  | 18 | 4886.60000  | 4852.48444  | 34.11556  |
| 21 | 6  | 15 | 20 | 6  | 15 | 28312.40000 | 28300.46759 | 11.93241  |
| 21 | 6  | 16 | 20 | 4  | 16 | 29061.90000 | 29043.94392 | 17.95608  |
| 21 | 7  | 14 | 21 | 5  | 16 | 16356.70000 | 16370.76849 | -14.06849 |
| 21 | 5  | 17 | 20 | 5  | 15 | 8505.10000  | 8485.58954  | 19.51046  |
| 21 | 7  | 15 | 21 | 5  | 17 | 20281.00000 | 20292.58490 | -11.58490 |
| 21 | 8  | 13 | 21 | 6  | 15 | 12423.40000 | 12443.01455 | -19.61455 |
| 21 | 8  | 14 | 21 | 6  | 16 | 18290.30000 | 18326.37641 | -36.07641 |
| 21 | 9  | 12 | 21 | 7  | 14 | 11455.10000 | 11486.91775 | -31.81775 |
| 22 | 9  | 14 | 21 | 9  | 12 | 20511.80000 | 20477.42895 | 34.37105  |
| 21 | 9  | 13 | 21 | 7  | 15 | 17313.00000 | 17327.38496 | -14.38496 |
| 21 | 10 | 11 | 21 | 8  | 13 | 14719.80000 | 14752.49778 | -32.69778 |
| 22 | 8  | 14 | 21 | 10 | 12 | 7932.50000  | 7921.46030  | 11.03970  |
| 21 | 11 | 11 | 21 | 9  | 13 | 19957.20000 | 19946.20907 | 10.99093  |
| 21 | 12 | 9  | 21 | 10 | 11 | 22355.50000 | 22359.67129 | -4.17129  |
| 22 | 12 | 11 | 21 | 12 | 9  | 21048.40000 | 21014.84313 | 33.55687  |
| 21 | 12 | 10 | 21 | 10 | 12 | 22478.40000 | 22486.88881 | -8.48881  |
| 22 | 12 | 10 | 21 | 12 | 10 | 21048.40000 | 21018.29492 | 30.10508  |
| 21 | 13 | 8  | 21 | 11 | 10 | 25014.70000 | 25033.66030 | -18.96030 |
| 22 | 13 | 10 | 21 | 13 | 8  | 20931.50000 | 20906.34537 | 25.15463  |
| 22 | 13 | 9  | 21 | 13 | 9  | 20931.50000 | 20906.54473 | 24.95527  |
| 21 | 14 | 7  | 21 | 12 | 9  | 27491.00000 | 27504.20570 | -13.20570 |
| 22 | 14 | 9  | 21 | 14 | 7  | 20856.60000 | 20822.73423 | 33.86577  |
| 21 | 14 | 8  | 21 | 12 | 10 | 27491.00000 | 27505.02834 | -14.02834 |
| 22 | 14 | 8  | 21 | 14 | 8  | 20856.60000 | 20822.74310 | 33.85690  |
| 22 | 15 | 8  | 21 | 13 | 8  | 50673.90000 | 50641.35605 | 32.54395  |
| 22 | 15 | 7  | 21 | 13 | 9  | 50673.90000 | 50641.39868 | 32.50132  |
| 21 | 16 | 5  | 21 | 14 | 7  | 32263.70000 | 32210.97500 | 52.72500  |
| 21 | 16 | 6  | 21 | 14 | 8  | 32263.70000 | 32210.97666 | 52.72334  |
| 23 | 1  | 23 | 21 | 1  | 21 | 33034.10000 | 33025.50255 | 8.59745   |
| 22 | 2  | 20 | 21 | 2  | 20 | 31244.40000 | 31260.31947 | -15.91947 |
| 23 | 2  | 22 | 22 | 2  | 20 | 3258.70000  | 3201.34631  | 57.35369  |
| 23 | 0  | 23 | 21 | 0  | 21 | 33034.10000 | 33025.50255 | 8.59745   |
| 23 | 3  | 21 | 21 | 3  | 19 | 35948.10000 | 35902.26401 | 45.83599  |
| 22 | 3  | 20 | 21 | 1  | 20 | 31244.40000 | 31260.32119 | -15.92119 |
| 23 | 1  | 22 | 22 | 3  | 20 | 3258.70000  | 3201.34466  | 57.35534  |
| 22 | 4  | 18 | 21 | 4  | 18 | 30812.70000 | 30809.00475 | 3.69525   |
| 23 | 4  | 20 | 22 | 4  | 18 | 6583.40000  | 6543.87404  | 39.52596  |
| 23 | 2  | 21 | 21 | 2  | 19 | 35948.10000 | 35902.26816 | 45.83184  |
| 22 | 3  | 19 | 21 | 5  | 17 | 6592.40000  | 6562.29879  | 30.10121  |
| 22 | 5  | 17 | 22 | 3  | 19 | 23899.50000 | 23919.93172 | -20.43172 |
| 22 | 6  | 17 | 22 | 4  | 19 | 23920.40000 | 23938.39752 | -17.99752 |
| 22 | 8  | 14 | 22 | 6  | 16 | 14246.10000 | 14257.45246 | -11.35246 |
| 22 | 9  | 13 | 22 | 7  | 15 | 11694.90000 | 11725.31495 | -30.41495 |
| 23 | 9  | 15 | 22 | 9  | 13 | 20709.70000 | 20669.54922 | 40.15078  |
| 22 | 9  | 14 | 22 | 7  | 16 | 18143.40000 | 18157.68870 | -14.28870 |
| 22 | 10 | 12 | 22 | 8  | 14 | 13661.50000 | 13692.14701 | -30.64701 |
| 22 | 10 | 13 | 22 | 8  | 15 | 18158.40000 | 18150.53658 | 7.86342   |
| 23 | 10 | 13 | 22 | 10 | 13 | 23009.10000 | 22984.76909 | 24.33091  |
| 24 | 1  | 24 | 22 | 1  | 22 | 34503.10000 | 34461.39959 | 41.70041  |
| 23 | 2  | 21 | 22 | 2  | 21 | 32677.40000 | 32698.31697 | -20.91697 |
| 24 | 2  | 23 | 23 | 2  | 21 | 3270.70000  | 3199.09621  | 71.60379  |
| 24 | 0  | 24 | 22 | 0  | 22 | 34503.10000 | 34461.39959 | 41.70041  |
| 24 | 3  | 22 | 22 | 3  | 20 | 37396.10000 | 37337.38292 | 58.71708  |
| 23 | 3  | 21 | 22 | 1  | 21 | 32677.40000 | 32698.31756 | -20.91756 |
| 23 | 2  | 21 | 22 | 4  | 19 | 4835.70000  | 4844.20369  | -8.50369  |
| 24 | 4  | 21 | 23 | 2  | 21 | 33975.50000 | 33941.94844 | 33.55156  |
| 24 | 2  | 22 | 22 | 2  | 20 | 37396.10000 | 37337.38436 | 58.71564  |
| 23 | 3  | 20 | 22 | 5  | 18 | 6559.50000  | 6542.63748  | 16.86252  |
| 23 | 5  | 18 | 23 | 3  | 20 | 25419.40000 | 25413.27780 | 6.12220   |
| 23 | 3  | 21 | 22 | 3  | 19 | 4835.70000  | 4844.25915  | -8.55915  |
| 24 | 3  | 21 | 23 | 3  | 21 | 33975.50000 | 33941.94059 | 33.55941  |
| 23 | 4  | 20 | 22 | 4  | 18 | 6559.50000  | 6543.87404  | 15.62596  |
| 23 | 6  | 17 | 22 | 8  | 15 | 11871.80000 | 11868.53679 | 3.26321   |
| 23 | 8  | 15 | 23 | 6  | 17 | 16308.70000 | 16351.61626 | -42.91626 |
| 23 | 8  | 16 | 22 | 6  | 16 | 31442.20000 | 31435.28019 | 6.91981   |
| 24 | 6  | 18 | 23 | 8  | 16 | 11982.70000 | 11973.85406 | 8.84594   |
| 23 | 9  | 15 | 23 | 7  | 17 | 19198.70000 | 19203.99943 | -5.29943  |
| 24 | 7  | 17 | 23 | 9  | 15 | 13115.90000 | 13108.85639 | 7.04361   |
| 24 | 9  | 15 | 24 | 7  | 17 | 14240.10000 | 14222.16094 | 17.93906  |
| 23 | 10 | 14 | 23 | 8  | 16 | 18587.10000 | 18570.15490 | 16.94510  |

|                   |             |             |           |
|-------------------|-------------|-------------|-----------|
| 24 11 14 23 11 12 | 23200.90000 | 23174.69834 | 26.20166  |
| 23 11 13 23 9 15  | 19636.40000 | 19625.31126 | 11.08874  |
| 23 12 11 23 10 13 | 21249.30000 | 21253.30982 | -4.00982  |
| 23 13 11 23 11 13 | 24520.00000 | 24504.40335 | 15.59665  |
| 23 14 9 23 12 11  | 27056.30000 | 27079.33372 | -23.03372 |
| 24 14 11 23 14 9  | 22856.20000 | 22823.83034 | 32.36966  |
| 23 14 10 23 12 12 | 27056.30000 | 27087.05742 | -30.75742 |
| 24 14 10 23 14 10 | 22856.20000 | 22823.96124 | 32.23876  |
| 23 16 7 23 14 9   | 32020.80000 | 31955.07428 | 65.72572  |
| 23 16 8 23 14 10  | 32020.80000 | 31955.10260 | 65.69740  |
| 25 1 25 23 1 23   | 35948.10000 | 35897.29862 | 50.80138  |
| 24 2 22 23 2 22   | 34131.40000 | 34136.03806 | -4.63806  |
| 25 2 24 24 2 22   | 3264.70000  | 3197.14526  | 67.55474  |
| 25 0 25 23 0 23   | 35948.10000 | 35897.29862 | 50.80138  |
| 25 3 23 23 3 21   | 38811.10000 | 38772.61877 | 38.48123  |
| 24 3 22 23 1 22   | 34131.40000 | 34136.03826 | -4.63826  |
| 24 4 20 23 4 20   | 33690.70000 | 33709.26856 | -18.56856 |
| 25 2 23 23 2 21   | 38811.10000 | 38772.61926 | 38.48074  |
| 24 5 19 23 5 19   | 33396.90000 | 33421.22806 | -24.32806 |
| 24 5 20 23 3 20   | 33690.70000 | 33709.47349 | -18.77349 |
| 24 4 20 23 6 18   | 8319.20000  | 8288.09874  | 31.10126  |
| 25 6 20 24 4 20   | 34871.90000 | 34882.76229 | -10.86229 |
| 24 6 19 23 4 19   | 33396.90000 | 33425.00719 | -28.10719 |
| 24 7 17 23 7 17   | 32305.60000 | 32312.85581 | -7.25581  |
| 25 7 19 24 7 17   | 12384.40000 | 12377.44731 | 6.95269   |
| 24 5 20 23 5 18   | 8319.20000  | 8296.19569  | 23.00431  |
| 25 5 20 24 5 20   | 34871.90000 | 34881.22835 | -9.32835  |
| 25 8 18 24 8 16   | 15691.10000 | 15656.97597 | 34.12403  |
| 24 8 17 23 6 17   | 32779.30000 | 32772.03502 | 7.26498   |
| 24 9 15 24 7 17   | 14195.20000 | 14222.16094 | -26.96094 |
| 24 9 16 24 7 18   | 20424.90000 | 20430.71510 | -5.81510  |
| 24 8 16 23 10 14  | 11940.70000 | 11932.52384 | 8.17616   |
| 24 10 14 24 8 16  | 12636.30000 | 12662.68899 | -26.38899 |
| 24 10 15 24 8 17  | 19234.70000 | 19231.20322 | 3.49678   |
| 24 11 13 24 9 15  | 15742.10000 | 15751.89873 | -9.79873  |
| 24 12 12 24 10 14 | 20400.90000 | 20388.23391 | 12.66609  |
| 25 13 12 24 13 12 | 23995.40000 | 23972.59861 | 22.80139  |
| 26 1 26 24 1 24   | 37396.10000 | 37333.19930 | 62.90070  |
| 26 2 25 24 2 23   | 38811.10000 | 38768.97219 | 42.12781  |
| 26 0 26 24 0 24   | 37396.10000 | 37333.19930 | 62.90070  |
| 25 3 22 24 3 22   | 35369.50000 | 35382.84264 | -13.34264 |
| 26 1 25 24 1 23   | 38811.10000 | 38768.97219 | 42.12781  |
| 26 4 23 24 4 21   | 41668.20000 | 41653.85368 | 14.34632  |
| 25 4 22 24 2 22   | 35369.50000 | 35382.84544 | -13.34544 |
| 25 3 23 24 3 21   | 4796.70000  | 4830.67818  | -33.97818 |
| 26 3 23 25 3 23   | 36871.50000 | 36823.18186 | 48.31814  |
| 25 4 21 24 6 19   | 8274.30000  | 8257.49524  | 16.80476  |
| 25 6 19 25 4 21   | 26240.80000 | 26267.97886 | -27.17886 |
| 26 6 21 25 6 19   | 10091.00000 | 10070.20115 | 20.79885  |
| 25 7 18 24 7 18   | 33960.50000 | 33960.03936 | 0.46064   |
| 25 5 21 24 5 19   | 8274.30000  | 8260.86669  | 13.43331  |
| 25 7 19 25 5 21   | 26240.80000 | 26286.58551 | -45.78551 |
| 26 5 21 25 7 19   | 10091.00000 | 10050.98268 | 40.01732  |
| 25 8 18 24 6 18   | 34185.30000 | 34185.80064 | -0.50064  |
| 25 9 16 25 7 18   | 16209.80000 | 16222.97375 | -13.17375 |
| 25 10 16 24 8 16  | 35762.20000 | 35786.88204 | -24.68204 |
| 25 11 14 25 9 16  | 14629.90000 | 14662.18823 | -32.28823 |
| 25 11 15 25 9 17  | 19915.20000 | 19914.07305 | 1.12695   |
| 26 12 14 25 12 14 | 25338.50000 | 25325.35075 | 13.14925  |
| 27 1 27 25 1 25   | 38811.10000 | 38769.10137 | 41.99863  |
| 26 2 24 25 2 24   | 37030.40000 | 37010.80468 | 19.59532  |
| 27 0 27 25 0 25   | 38811.10000 | 38769.10137 | 41.99863  |
| 27 3 25 25 3 23   | 41668.20000 | 41643.35888 | 24.84112  |
| 26 3 24 25 1 24   | 37030.40000 | 37010.80470 | 19.59530  |
| 26 4 22 25 4 22   | 36589.70000 | 36602.55034 | -12.85034 |
| 27 4 24 26 4 22   | 6502.50000  | 6485.59453  | 16.90547  |
| 27 2 25 25 2 23   | 41668.20000 | 41643.35894 | 24.84106  |
| 27 3 24 25 3 22   | 43092.20000 | 43088.14715 | 4.05285   |
| 27 6 22 26 4 22   | 37803.80000 | 37791.43393 | 12.36607  |
| 26 7 19 26 5 21   | 25467.40000 | 25480.82890 | -13.42890 |
| 27 5 22 26 5 22   | 37803.80000 | 37791.19368 | 12.60632  |
| 26 6 20 25 8 18   | 11958.70000 | 11960.83393 | -2.13393  |
| 26 8 18 26 6 20   | 22583.40000 | 22598.62670 | -15.22670 |
| 26 8 19 26 6 21   | 25548.30000 | 25568.33444 | -20.03444 |
| 26 9 17 26 7 19   | 18434.20000 | 18449.89995 | -15.69995 |
| 26 11 16 26 9 18  | 20391.90000 | 20396.22476 | -4.32476  |
| 27 9 18 26 11 16  | 14126.20000 | 14117.64561 | 8.55439   |
| 27 12 15 26 12 15 | 26546.60000 | 26550.72328 | -4.12328  |

|                   |             |             |           |
|-------------------|-------------|-------------|-----------|
| 26 14 12 26 12 14 | 26046.00000 | 26062.11009 | -16.11009 |
| 26 15 11 26 13 13 | 28816.10000 | 28846.87578 | -30.77578 |
| 26 16 10 26 14 12 | 31442.20000 | 31405.47353 | 36.72647  |
| 26 16 11 26 14 13 | 31442.20000 | 31406.54185 | 35.65815  |
| 28 2 27 26 2 25   | 41668.20000 | 41640.59412 | 27.60588  |
| 27 1 26 26 3 24   | 3183.80000  | 3193.97192  | -10.17192 |
| 28 3 26 27 1 26   | 39908.40000 | 39884.86074 | 23.53926  |
| 28 1 27 26 1 25   | 41668.20000 | 41640.59412 | 27.60588  |
| 28 4 25 26 4 23   | 44525.20000 | 44522.65951 | 2.54049   |
| 27 2 26 26 2 24   | 3183.80000  | 3193.97194  | -10.17194 |
| 28 2 26 27 2 26   | 39908.40000 | 39884.86074 | 23.53926  |
| 28 3 25 26 3 23   | 44525.20000 | 44522.66033 | 2.53967   |
| 27 6 21 26 6 21   | 37453.10000 | 37477.43281 | -24.33281 |
| 27 6 22 26 4 22   | 37743.90000 | 37791.43393 | -47.53393 |
| 27 7 20 27 5 22   | 27038.30000 | 27051.74316 | -13.44316 |
| 28 7 22 27 7 20   | 11919.70000 | 11892.91470 | 26.78530  |
| 27 7 21 26 5 21   | 37453.10000 | 37481.40779 | -28.30779 |
| 27 8 19 27 6 21   | 24394.10000 | 24416.24334 | -22.14334 |
| 28 6 22 27 6 22   | 38958.00000 | 38943.01695 | 14.98305  |
| 27 9 19 26 7 19   | 36721.60000 | 36759.44652 | -37.84652 |
| 28 7 21 27 9 19   | 13838.40000 | 13802.27986 | 36.12014  |
| 27 8 19 26 10 17  | 15085.60000 | 15084.17039 | 1.42961   |
| 27 10 17 27 8 19  | 16050.90000 | 16065.93572 | -15.03572 |
| 27 10 18 26 8 18  | 37012.40000 | 37034.64582 | -22.24582 |
| 27 11 16 27 9 18  | 13847.40000 | 13875.70351 | -28.30351 |
| 28 12 17 27 10 17 | 43679.80000 | 43702.57510 | -22.77510 |
| 27 14 13 27 12 15 | 25527.30000 | 25535.19727 | -7.89727  |
| 27 15 12 27 13 14 | 28489.30000 | 28520.10997 | -30.80997 |
| 27 17 10 27 15 12 | 33723.70000 | 33666.43864 | 57.26136  |
| 27 17 11 27 15 13 | 33723.70000 | 33666.65706 | 57.04294  |
| 29 1 29 27 1 27   | 41668.20000 | 41640.90886 | 27.29114  |
| 28 0 28 27 2 26   | 1591.90000  | 1596.50640  | -4.60640  |
| 29 2 28 28 0 28   | 41500.30000 | 41479.91623 | 20.38377  |
| 29 0 29 27 0 27   | 41668.20000 | 41640.90886 | 27.29114  |
| 29 3 27 27 3 25   | 44525.20000 | 44514.36045 | 10.83955  |
| 29 1 28 27 1 26   | 43092.20000 | 43076.42263 | 15.77737  |
| 29 4 26 27 4 24   | 45961.20000 | 45957.35840 | 3.84160   |
| 29 2 27 27 2 25   | 44525.20000 | 44514.36046 | 10.83954  |
| 28 5 23 27 5 23   | 39197.90000 | 39242.69125 | -44.79125 |
| 29 5 25 28 5 23   | 8196.30000  | 8166.90290  | 29.39710  |
| 29 3 26 27 3 24   | 45961.20000 | 45957.35869 | 3.84131   |
| 28 4 24 27 6 22   | 8172.30000  | 8185.41642  | -13.11642 |
| 28 6 23 27 4 23   | 39197.90000 | 39242.78427 | -44.88427 |
| 29 4 25 28 6 23   | 8196.30000  | 8166.81839  | 29.48161  |
| 28 5 23 27 7 21   | 9953.10000  | 9968.29407  | -15.19407 |
| 29 7 23 28 5 23   | 40430.00000 | 40405.09571 | 24.90429  |
| 28 5 24 27 5 22   | 8172.30000  | 8185.63382  | -13.33382 |
| 28 6 22 27 8 20   | 11844.80000 | 11850.72687 | -5.92687  |
| 28 8 20 28 6 22   | 26105.90000 | 26123.39053 | -17.49053 |
| 29 8 22 28 8 20   | 13967.30000 | 13934.00845 | 33.29155  |
| 28 6 23 27 6 21   | 9953.10000  | 9971.81081  | -18.71081 |
| 29 6 23 28 6 23   | 40430.00000 | 40404.42971 | 25.57029  |
| 28 7 22 27 7 20   | 11877.80000 | 11892.91470 | -15.11470 |
| 29 11 19 28 11 17 | 25557.30000 | 25520.57949 | 36.72051  |
| 29 12 18 28 12 16 | 27751.80000 | 27736.15589 | 15.64411  |
| 28 12 17 28 10 19 | 21654.00000 | 21665.93593 | -11.93593 |
| 28 14 15 28 12 17 | 25428.40000 | 25447.06682 | -18.66682 |
| 28 15 13 28 13 15 | 28081.60000 | 28125.68047 | -44.08047 |
| 30 1 30 28 1 28   | 43092.20000 | 43076.81396 | 15.38604  |
| 30 2 29 28 2 27   | 44525.20000 | 44512.26052 | 12.93948  |
| 30 0 30 28 0 28   | 43092.20000 | 43076.81396 | 15.38604  |
| 30 3 28 28 3 26   | 45961.20000 | 45949.93369 | 11.26631  |
| 30 1 29 28 1 27   | 44525.20000 | 44512.26052 | 12.93948  |
| 29 2 27 28 4 25   | 4784.70000  | 4811.87703  | -27.17703 |
| 30 4 27 29 2 27   | 42609.50000 | 42580.33337 | 29.16663  |
| 30 2 28 28 2 26   | 45961.20000 | 45949.93369 | 11.26631  |
| 29 5 24 28 5 24   | 40666.90000 | 40692.45571 | -25.55571 |
| 30 5 26 29 5 24   | 8169.30000  | 8150.33179  | 18.96821  |
| 29 3 27 28 3 25   | 4784.70000  | 4811.87715  | -27.17715 |
| 30 3 27 29 3 27   | 42609.50000 | 42580.33336 | 29.16664  |
| 29 6 24 28 4 24   | 40666.90000 | 40692.49127 | -25.59127 |
| 30 4 26 29 6 24   | 8169.30000  | 8150.29937  | 19.00063  |
| 30 7 24 28 7 22   | 51792.20000 | 51796.38174 | -4.18174  |
| 30 8 23 28 8 21   | 53321.10000 | 53322.61613 | -1.51613  |
| 29 8 22 28 6 22   | 40013.30000 | 40057.39898 | -44.09898 |
| 30 6 24 29 8 22   | 11778.80000 | 11740.17564 | 38.62436  |
| 29 9 20 29 7 22   | 24795.80000 | 24823.00946 | -27.20946 |
| 30 10 21 29 10 19 | 20158.00000 | 20162.19754 | -4.19754  |

|    |    |    |    |    |    |             |             |           |
|----|----|----|----|----|----|-------------|-------------|-----------|
| 29 | 8  | 22 | 28 | 8  | 20 | 13922.40000 | 13934.00845 | -11.60845 |
| 30 | 8  | 22 | 29 | 8  | 22 | 41080.60000 | 41082.88600 | -2.28600  |
| 30 | 9  | 21 | 29 | 11 | 19 | 17091.20000 | 17063.92821 | 27.27179  |
| 29 | 13 | 16 | 29 | 11 | 18 | 18916.90000 | 18918.68570 | -1.78570  |
| 29 | 14 | 15 | 29 | 12 | 17 | 23896.50000 | 23914.25384 | -17.75384 |
| 29 | 15 | 14 | 29 | 13 | 16 | 27619.90000 | 27636.12113 | -16.22113 |
| 29 | 17 | 12 | 29 | 15 | 14 | 33238.00000 | 33205.08709 | 32.91291  |
| 29 | 17 | 13 | 29 | 15 | 15 | 33238.00000 | 33207.05680 | 30.94320  |
| 31 | 1  | 31 | 29 | 1  | 29 | 44525.20000 | 44512.71980 | 12.48020  |
| 31 | 2  | 30 | 29 | 2  | 28 | 45961.20000 | 45948.10642 | 13.09358  |
| 31 | 0  | 31 | 29 | 0  | 29 | 44525.20000 | 44512.71980 | 12.48020  |
| 31 | 3  | 29 | 29 | 3  | 27 | 47394.20000 | 47385.54546 | 8.65454   |
| 31 | 1  | 30 | 29 | 1  | 28 | 45961.20000 | 45948.10642 | 13.09358  |
| 30 | 4  | 26 | 29 | 4  | 26 | 42402.70000 | 42376.68806 | 26.01194  |
| 31 | 4  | 28 | 30 | 4  | 26 | 6433.50000  | 6450.50260  | -17.00260 |
| 31 | 2  | 29 | 29 | 2  | 27 | 47394.20000 | 47385.54546 | 8.65454   |
| 30 | 5  | 25 | 29 | 5  | 25 | 42132.80000 | 42140.77245 | -7.97245  |
| 31 | 5  | 27 | 30 | 5  | 25 | 8130.40000  | 8135.56163  | -5.16163  |
| 30 | 5  | 26 | 29 | 3  | 26 | 42402.70000 | 42376.68857 | 26.01143  |
| 31 | 3  | 28 | 30 | 5  | 26 | 6433.50000  | 6450.50212  | -17.00212 |
| 30 | 6  | 25 | 29 | 4  | 25 | 42132.80000 | 42140.78589 | -7.98589  |
| 31 | 4  | 27 | 30 | 6  | 25 | 8130.40000  | 8135.54934  | -5.14934  |
| 31 | 7  | 25 | 29 | 7  | 23 | 53219.20000 | 53221.10775 | -1.90775  |
| 31 | 6  | 25 | 29 | 6  | 23 | 53219.20000 | 53221.59774 | -2.39774  |
| 31 | 9  | 23 | 30 | 9  | 21 | 15972.90000 | 15960.27792 | 12.62208  |
| 31 | 7  | 24 | 30 | 9  | 22 | 13649.60000 | 13614.89252 | 34.70748  |
| 30 | 10 | 21 | 30 | 8  | 23 | 26966.30000 | 26969.76288 | -3.46288  |
| 31 | 8  | 23 | 30 | 10 | 21 | 15643.20000 | 15620.90139 | 22.29861  |
| 30 | 12 | 18 | 30 | 10 | 20 | 15115.50000 | 15141.81590 | -26.31590 |
| 31 | 11 | 20 | 30 | 13 | 18 | 14671.80000 | 14628.98890 | 42.81110  |
| 30 | 16 | 14 | 30 | 14 | 16 | 30168.10000 | 30179.94318 | -11.84318 |
| 32 | 1  | 32 | 30 | 1  | 30 | 45961.20000 | 45948.62628 | 12.57372  |
| 32 | 2  | 31 | 30 | 2  | 29 | 47394.20000 | 47383.95924 | 10.24076  |
| 32 | 0  | 32 | 30 | 0  | 30 | 45961.20000 | 45948.62628 | 12.57372  |
| 32 | 3  | 30 | 30 | 3  | 28 | 48836.20000 | 48821.19012 | 15.00988  |
| 32 | 1  | 31 | 30 | 1  | 29 | 47394.20000 | 47383.95924 | 10.24076  |
| 31 | 2  | 29 | 30 | 4  | 27 | 4772.70000  | 4805.21209  | -32.51209 |
| 32 | 4  | 29 | 31 | 2  | 29 | 45490.50000 | 45457.06708 | 33.43292  |
| 32 | 2  | 30 | 30 | 2  | 28 | 48836.20000 | 48821.19012 | 15.00988  |
| 31 | 5  | 26 | 30 | 5  | 26 | 43583.80000 | 43587.85907 | -4.05907  |
| 32 | 5  | 28 | 31 | 5  | 26 | 8103.40000  | 8122.31601  | -18.91601 |
| 31 | 3  | 29 | 30 | 3  | 27 | 4772.70000  | 4805.21211  | -32.51211 |
| 32 | 3  | 29 | 31 | 3  | 29 | 45490.50000 | 45457.06708 | 33.43292  |
| 31 | 4  | 27 | 30 | 6  | 25 | 8094.40000  | 8135.54934  | -41.14934 |
| 31 | 6  | 26 | 30 | 4  | 26 | 43583.80000 | 43587.86409 | -4.06409  |
| 32 | 4  | 28 | 31 | 6  | 26 | 8103.40000  | 8122.31140  | -18.91140 |
| 31 | 5  | 27 | 30 | 5  | 25 | 8094.40000  | 8135.56163  | -41.16163 |
| 31 | 6  | 25 | 30 | 8  | 23 | 11655.90000 | 11692.30273 | -36.40273 |
| 32 | 8  | 25 | 31 | 6  | 25 | 44483.20000 | 44463.31093 | 19.88907  |
| 31 | 7  | 24 | 30 | 9  | 22 | 13580.60000 | 13614.89252 | -34.29252 |
| 32 | 9  | 24 | 31 | 7  | 24 | 44111.50000 | 44092.54832 | 18.95168  |
| 31 | 7  | 25 | 30 | 7  | 23 | 11655.90000 | 11695.85487 | -39.95487 |
| 32 | 7  | 25 | 31 | 7  | 25 | 44483.20000 | 44462.61362 | 20.58638  |
| 32 | 10 | 23 | 31 | 8  | 23 | 43664.80000 | 43659.93502 | 4.86498   |
| 32 | 9  | 23 | 31 | 11 | 21 | 17510.90000 | 17493.87313 | 17.02687  |
| 32 | 10 | 22 | 31 | 12 | 20 | 18545.20000 | 18530.98717 | 14.21283  |
| 31 | 13 | 19 | 31 | 11 | 21 | 23371.80000 | 23412.33035 | -40.53035 |
| 33 | 1  | 33 | 31 | 1  | 31 | 47394.20000 | 47384.53333 | 9.66667   |
| 32 | 2  | 30 | 31 | 2  | 30 | 45640.40000 | 45631.45550 | 8.94450   |
| 33 | 2  | 32 | 32 | 2  | 30 | 3195.80000  | 3188.36254  | 7.43746   |
| 33 | 0  | 33 | 31 | 0  | 31 | 47394.20000 | 47384.53333 | 9.66667   |
| 33 | 3  | 31 | 31 | 3  | 29 | 50263.20000 | 50256.86302 | 6.33698   |
| 32 | 3  | 30 | 31 | 1  | 30 | 45640.40000 | 45631.45550 | 8.94450   |
| 33 | 1  | 32 | 32 | 3  | 30 | 3195.80000  | 3188.36254  | 7.43746   |
| 32 | 2  | 30 | 31 | 4  | 28 | 4757.70000  | 4802.36707  | -44.66707 |
| 33 | 4  | 30 | 32 | 2  | 30 | 46929.50000 | 46895.09265 | 34.40735  |
| 33 | 2  | 31 | 31 | 2  | 29 | 50263.20000 | 50256.86302 | 6.33698   |
| 32 | 3  | 30 | 31 | 3  | 28 | 4757.70000  | 4802.36707  | -44.66707 |
| 33 | 3  | 30 | 32 | 3  | 30 | 46929.50000 | 46895.09265 | 34.40735  |
| 33 | 6  | 28 | 32 | 4  | 28 | 46497.80000 | 46478.99841 | 18.80159  |
| 32 | 5  | 27 | 31 | 7  | 25 | 9800.20000  | 9850.92117  | -50.72117 |
| 32 | 6  | 26 | 31 | 8  | 24 | 11599.00000 | 11649.64333 | -50.64333 |
| 33 | 8  | 26 | 32 | 6  | 26 | 45952.20000 | 45925.72945 | 26.47055  |
| 32 | 6  | 27 | 31 | 6  | 25 | 9800.20000  | 9851.01569  | -50.81569 |
| 32 | 9  | 23 | 32 | 7  | 25 | 30024.20000 | 30017.74163 | 6.45837   |
| 33 | 9  | 25 | 32 | 9  | 23 | 15577.20000 | 15552.39523 | 24.80477  |
| 32 | 7  | 26 | 31 | 7  | 24 | 11599.00000 | 11651.13808 | -52.13808 |
| 33 | 7  | 26 | 32 | 7  | 26 | 45952.20000 | 45925.44643 | 26.75357  |

|    |    |    |    |    |    |             |             |           |
|----|----|----|----|----|----|-------------|-------------|-----------|
| 33 | 8  | 25 | 32 | 8  | 25 | 45601.40000 | 45566.13030 | 35.26970  |
| 32 | 11 | 22 | 32 | 9  | 24 | 27562.90000 | 27600.81057 | -37.91057 |
| 32 | 13 | 19 | 32 | 11 | 21 | 16083.90000 | 16106.16824 | -22.26824 |
| 34 | 1  | 34 | 32 | 1  | 32 | 48836.20000 | 48820.44086 | 15.75914  |
| 33 | 2  | 31 | 32 | 2  | 31 | 47076.40000 | 47067.86488 | 8.53512   |
| 34 | 2  | 33 | 33 | 2  | 31 | 3186.80000  | 3187.81716  | -1.01716  |
| 34 | 0  | 34 | 32 | 0  | 32 | 48836.20000 | 48820.44086 | 15.75914  |
| 34 | 3  | 32 | 32 | 3  | 30 | 51687.20000 | 51692.56031 | -5.36031  |
| 33 | 3  | 31 | 32 | 1  | 31 | 47076.40000 | 47067.86488 | 8.53512   |
| 34 | 1  | 33 | 33 | 3  | 31 | 3186.80000  | 3187.81716  | -1.01716  |
| 34 | 4  | 31 | 32 | 4  | 29 | 53123.20000 | 53132.71899 | -9.51899  |
| 34 | 2  | 32 | 32 | 2  | 30 | 51687.20000 | 51692.56031 | -5.36031  |
| 33 | 3  | 31 | 32 | 3  | 29 | 4772.70000  | 4799.79594  | -27.09594 |
| 34 | 3  | 31 | 33 | 3  | 31 | 48350.50000 | 48332.92305 | 17.57695  |
| 34 | 4  | 30 | 32 | 4  | 28 | 54550.20000 | 54578.56058 | -28.36058 |
| 33 | 5  | 28 | 32 | 7  | 26 | 9770.20000  | 9829.18265  | -58.98265 |
| 33 | 7  | 26 | 33 | 5  | 28 | 36140.00000 | 36096.26378 | 43.73622  |
| 34 | 8  | 27 | 32 | 8  | 25 | 58957.20000 | 58997.24583 | -40.04583 |
| 33 | 8  | 26 | 33 | 6  | 28 | 36140.00000 | 36096.50988 | 43.49012  |
| 34 | 7  | 27 | 32 | 7  | 25 | 58957.20000 | 58997.75102 | -40.55102 |
| 33 | 11 | 22 | 33 | 9  | 24 | 25089.60000 | 25089.27756 | 0.32244   |
| 33 | 12 | 22 | 33 | 10 | 24 | 26687.50000 | 26699.24322 | -11.74322 |
| 33 | 13 | 20 | 33 | 11 | 22 | 16449.60000 | 16474.08922 | -24.48922 |
| 33 | 14 | 20 | 33 | 12 | 22 | 24702.90000 | 24723.85317 | -20.95317 |
| 33 | 19 | 14 | 33 | 17 | 16 | 37348.10000 | 37283.00966 | 65.09034  |
| 33 | 19 | 15 | 33 | 17 | 17 | 37348.10000 | 37283.78266 | 64.31734  |
| 35 | 1  | 35 | 33 | 1  | 33 | 50263.20000 | 50256.34882 | 6.85118   |
| 35 | 2  | 34 | 33 | 2  | 32 | 51687.20000 | 51691.55058 | -4.35058  |
| 35 | 0  | 35 | 33 | 0  | 33 | 50263.20000 | 50256.34882 | 6.85118   |
| 35 | 3  | 33 | 33 | 3  | 31 | 53123.20000 | 53128.27877 | -5.07877  |
| 35 | 1  | 34 | 33 | 1  | 32 | 51687.20000 | 51691.55058 | -4.35058  |
| 34 | 2  | 32 | 33 | 4  | 30 | 4778.70000  | 4797.46766  | -18.76766 |
| 35 | 4  | 32 | 34 | 2  | 32 | 49771.60000 | 49770.57837 | 1.02163   |
| 35 | 2  | 33 | 33 | 2  | 31 | 53123.20000 | 53128.27877 | -5.07877  |
| 35 | 5  | 31 | 33 | 5  | 29 | 55986.20000 | 56013.03583 | -26.83583 |
| 34 | 3  | 32 | 33 | 3  | 30 | 4778.70000  | 4797.46766  | -18.76766 |
| 35 | 3  | 32 | 34 | 3  | 32 | 49771.60000 | 49770.57837 | 1.02163   |
| 34 | 6  | 28 | 34 | 4  | 30 | 39605.60000 | 39574.87252 | 30.72748  |
| 35 | 6  | 30 | 34 | 6  | 28 | 9767.20000  | 9792.03120  | -24.83120 |
| 34 | 5  | 29 | 33 | 7  | 27 | 9779.20000  | 9809.65389  | -30.45389 |
| 34 | 7  | 28 | 34 | 5  | 30 | 39605.60000 | 39574.87787 | 30.72213  |
| 34 | 6  | 29 | 33 | 6  | 27 | 9779.20000  | 9809.66814  | -30.46814 |
| 35 | 10 | 26 | 34 | 10 | 24 | 17555.80000 | 17515.08484 | 40.71516  |
| 35 | 12 | 24 | 34 | 12 | 22 | 24867.80000 | 24868.67875 | -0.87875  |
| 35 | 11 | 24 | 34 | 13 | 22 | 20598.70000 | 20580.99053 | 17.70947  |
| 36 | 1  | 36 | 34 | 1  | 34 | 51687.20000 | 51692.25717 | -5.05717  |
| 36 | 2  | 35 | 34 | 2  | 33 | 53123.20000 | 53127.42312 | -4.22312  |
| 36 | 0  | 36 | 34 | 0  | 34 | 51687.20000 | 51692.25717 | -5.05717  |
| 36 | 3  | 34 | 34 | 3  | 32 | 54550.20000 | 54564.01571 | -13.81571 |
| 36 | 1  | 35 | 34 | 1  | 33 | 53123.20000 | 53127.42312 | -4.22312  |
| 36 | 4  | 33 | 34 | 4  | 31 | 55986.20000 | 56003.43174 | -17.23174 |
| 36 | 2  | 34 | 34 | 2  | 32 | 54550.20000 | 54564.01571 | -13.81571 |
| 36 | 3  | 33 | 34 | 3  | 31 | 55986.20000 | 56003.43174 | -17.23174 |
| 36 | 4  | 32 | 34 | 4  | 30 | 57419.30000 | 57447.66375 | -28.36375 |
| 35 | 5  | 30 | 34 | 7  | 28 | 9737.30000  | 9792.02575  | -54.72575 |
| 35 | 6  | 30 | 34 | 6  | 28 | 9737.30000  | 9792.03120  | -54.73120 |
| 36 | 11 | 26 | 35 | 11 | 24 | 19918.20000 | 19905.74769 | 12.45231  |
| 35 | 16 | 20 | 35 | 14 | 22 | 28153.50000 | 28144.90467 | 8.59533   |
| 35 | 18 | 18 | 35 | 16 | 20 | 33939.50000 | 33896.47471 | 43.02529  |
| 35 | 21 | 14 | 35 | 19 | 16 | 41899.00000 | 41856.09727 | 42.90273  |
| 35 | 21 | 15 | 35 | 19 | 17 | 41899.00000 | 41856.13153 | 42.86847  |
| 37 | 1  | 37 | 35 | 1  | 35 | 53123.20000 | 53128.16585 | -4.96585  |
| 37 | 2  | 36 | 35 | 2  | 34 | 54550.20000 | 54563.29918 | -13.09918 |
| 37 | 0  | 37 | 35 | 0  | 35 | 53123.20000 | 53128.16585 | -4.96585  |
| 36 | 3  | 33 | 35 | 3  | 33 | 51186.60000 | 51208.07602 | -21.47602 |
| 37 | 3  | 35 | 36 | 3  | 33 | 4799.70000  | 4791.69283  | 8.00717   |
| 37 | 1  | 36 | 35 | 1  | 34 | 54550.20000 | 54563.29918 | -13.09918 |
| 37 | 4  | 34 | 35 | 4  | 32 | 57419.30000 | 57438.86849 | -19.56849 |
| 36 | 4  | 33 | 35 | 2  | 33 | 51186.60000 | 51208.07602 | -21.47602 |
| 37 | 2  | 35 | 36 | 4  | 33 | 4799.70000  | 4791.69283  | 8.00717   |
| 37 | 5  | 33 | 35 | 5  | 31 | 58846.30000 | 58882.42323 | -36.12323 |
| 37 | 3  | 34 | 35 | 3  | 32 | 57419.30000 | 57438.86849 | -19.56849 |
| 37 | 6  | 32 | 36 | 4  | 32 | 52268.80000 | 52252.29222 | 16.50778  |
| 37 | 4  | 33 | 35 | 4  | 31 | 58846.30000 | 58882.42323 | -36.12323 |
| 36 | 13 | 23 | 36 | 11 | 25 | 21941.80000 | 21972.92301 | -31.12301 |
| 36 | 13 | 24 | 36 | 11 | 26 | 28783.10000 | 28783.87951 | -0.77951  |
| 38 | 1  | 38 | 36 | 1  | 36 | 54550.20000 | 54564.07483 | -13.87483 |
| 38 | 2  | 37 | 36 | 2  | 35 | 55986.20000 | 55999.17835 | -12.97835 |

|    |    |    |    |    |    |             |             |           |
|----|----|----|----|----|----|-------------|-------------|-----------|
| 38 | 0  | 38 | 36 | 0  | 36 | 54550.20000 | 54564.07483 | -13.87483 |
| 38 | 3  | 36 | 36 | 3  | 34 | 57419.30000 | 57435.53623 | -16.23623 |
| 38 | 1  | 37 | 36 | 1  | 35 | 55986.20000 | 55999.17835 | -12.97835 |
| 38 | 4  | 35 | 36 | 4  | 33 | 58846.30000 | 58874.34986 | -28.04986 |
| 38 | 2  | 36 | 36 | 2  | 34 | 57419.30000 | 57435.53623 | -16.23623 |
| 38 | 3  | 35 | 36 | 3  | 33 | 58846.30000 | 58874.34986 | -28.04986 |
| 38 | 9  | 30 | 37 | 9  | 28 | 15094.60000 | 15116.07232 | -21.47232 |
| 38 | 10 | 29 | 37 | 10 | 27 | 17106.20000 | 17096.34877 | 9.85123   |
| 38 | 8  | 30 | 37 | 10 | 28 | 15094.60000 | 15114.61489 | -20.01489 |
| 37 | 13 | 24 | 37 | 11 | 26 | 24547.00000 | 24555.66624 | -8.66624  |
| 37 | 15 | 23 | 37 | 13 | 25 | 26903.40000 | 26908.45775 | -5.05775  |
| 37 | 16 | 21 | 37 | 14 | 23 | 22982.10000 | 22978.48522 | 3.61478   |
| 39 | 1  | 39 | 37 | 1  | 37 | 55986.20000 | 55999.98407 | -13.78407 |
| 39 | 2  | 38 | 37 | 2  | 36 | 57419.30000 | 57435.06030 | -15.76030 |
| 39 | 0  | 39 | 37 | 0  | 37 | 55986.20000 | 55999.98407 | -13.78407 |
| 39 | 3  | 37 | 37 | 3  | 35 | 58846.30000 | 58871.31622 | -25.01622 |
| 39 | 1  | 38 | 37 | 1  | 36 | 57419.30000 | 57435.06030 | -15.76030 |
| 39 | 4  | 36 | 37 | 4  | 34 | 60276.30000 | 60309.87043 | -33.57043 |
| 39 | 2  | 37 | 37 | 2  | 35 | 58846.30000 | 58871.31622 | -25.01622 |
| 39 | 5  | 35 | 38 | 5  | 33 | 8073.40000  | 8058.06030  | 15.33970  |
| 39 | 3  | 36 | 37 | 3  | 34 | 60276.30000 | 60309.87043 | -33.57043 |
| 38 | 6  | 32 | 38 | 4  | 34 | 45412.60000 | 45399.68291 | 12.91709  |
| 39 | 6  | 34 | 38 | 6  | 32 | 9737.30000  | 9735.99638  | 1.30362   |
| 39 | 4  | 35 | 38 | 6  | 33 | 8073.40000  | 8058.06029  | 15.33971  |
| 38 | 7  | 32 | 38 | 5  | 34 | 45412.60000 | 45399.68302 | 12.91698  |
| 39 | 10 | 30 | 38 | 8  | 30 | 54049.60000 | 54030.10790 | 19.49210  |
| 39 | 9  | 30 | 38 | 9  | 30 | 54049.60000 | 54029.81500 | 19.78500  |
| 38 | 16 | 22 | 38 | 14 | 24 | 21372.20000 | 21353.51240 | 18.68760  |
| 40 | 1  | 40 | 38 | 1  | 38 | 57419.30000 | 57435.89356 | -16.59356 |
| 40 | 2  | 39 | 38 | 2  | 37 | 58846.30000 | 58870.94471 | -24.64471 |
| 40 | 0  | 40 | 38 | 0  | 38 | 57419.30000 | 57435.89356 | -16.59356 |
| 40 | 3  | 38 | 38 | 3  | 36 | 60276.30000 | 60307.10738 | -30.80738 |
| 40 | 1  | 39 | 38 | 1  | 37 | 58846.30000 | 58870.94471 | -24.64471 |
| 39 | 4  | 35 | 38 | 4  | 35 | 55344.70000 | 55337.65902 | 7.04098   |
| 40 | 4  | 37 | 39 | 4  | 35 | 6400.60000  | 6407.76654  | -7.16654  |
| 40 | 2  | 38 | 38 | 2  | 36 | 60276.30000 | 60307.10738 | -30.80738 |
| 39 | 5  | 35 | 38 | 3  | 35 | 55344.70000 | 55337.65902 | 7.04098   |
| 40 | 3  | 37 | 39 | 5  | 35 | 6400.60000  | 6407.76654  | -7.16654  |
| 40 | 6  | 35 | 39 | 6  | 33 | 9743.30000  | 9724.77912  | 18.52088  |
| 40 | 4  | 36 | 39 | 6  | 34 | 8070.40000  | 8051.65051  | 18.74949  |
| 40 | 5  | 35 | 39 | 7  | 33 | 9743.30000  | 9724.77908  | 18.52092  |
| 39 | 12 | 28 | 39 | 10 | 30 | 36191.00000 | 36161.04650 | 29.95350  |
| 40 | 11 | 29 | 39 | 11 | 29 | 54682.20000 | 54651.61195 | 30.58805  |
| 41 | 2  | 40 | 39 | 2  | 38 | 60276.30000 | 60306.83133 | -30.53133 |
| 41 | 3  | 39 | 39 | 3  | 37 | 61745.30000 | 61742.90849 | 2.39151   |
| 41 | 1  | 40 | 39 | 1  | 38 | 60276.30000 | 60306.83133 | -30.53133 |
| 41 | 2  | 39 | 39 | 2  | 37 | 61745.30000 | 61742.90849 | 2.39151   |
| 40 | 15 | 25 | 40 | 13 | 27 | 21141.40000 | 21129.52527 | 11.87473  |
| 42 | 1  | 42 | 40 | 1  | 40 | 60276.30000 | 60307.71315 | -31.41315 |
| 42 | 2  | 41 | 40 | 2  | 39 | 61745.30000 | 61742.71993 | 2.58007   |
| 42 | 0  | 42 | 40 | 0  | 40 | 60276.30000 | 60307.71315 | -31.41315 |
| 42 | 1  | 41 | 40 | 1  | 39 | 61745.30000 | 61742.71993 | 2.58007   |
| 41 | 14 | 28 | 41 | 12 | 30 | 34083.40000 | 34079.61998 | 3.78002   |
| 41 | 20 | 22 | 41 | 18 | 24 | 37078.30000 | 37039.54250 | 38.75750  |
| 42 | 18 | 24 | 41 | 20 | 22 | 4251.10000  | 4316.22040  | -65.12040 |
| 43 | 8  | 36 | 42 | 8  | 34 | 13118.90000 | 13118.98068 | -0.08068  |
| 42 | 13 | 29 | 42 | 11 | 31 | 35546.40000 | 35507.32366 | 39.07634  |
| 42 | 14 | 28 | 42 | 12 | 30 | 31751.00000 | 31707.99144 | 43.00856  |
| 44 | 8  | 37 | 43 | 8  | 35 | 13118.90000 | 13098.12395 | 20.77605  |
| 44 | 7  | 37 | 43 | 9  | 35 | 13118.90000 | 13098.12357 | 20.77643  |
| 44 | 6  | 38 | 44 | 4  | 40 | 54061.60000 | 54097.15395 | -35.55395 |
| 45 | 6  | 40 | 44 | 6  | 38 | 9689.30000  | 9680.06647  | 9.23353   |
| 45 | 5  | 40 | 44 | 7  | 38 | 9689.30000  | 9680.06647  | 9.23353   |
| 44 | 17 | 28 | 44 | 15 | 30 | 31397.30000 | 31382.29701 | 15.00299  |
| 48 | 17 | 32 | 48 | 15 | 34 | 37162.30000 | 37136.98806 | 25.31194  |

|                 |       |                |               |         |
|-----------------|-------|----------------|---------------|---------|
| 1               | 10099 | A              | 1010.794( 47) | -0.000  |
| 2               | 20099 | B              | 556.3229(254) | 0.0000  |
| 3               | 30099 | C              | 358.9781(168) | -0.0000 |
| MICROWAVE AVG = |       | -0.852411 MHz, | IR AVG =      | 0.00000 |
| MICROWAVE RMS = |       | 22.849811 MHz, | IR RMS =      | 0.00000 |
